# Supplementary material for: Cyclopentadienyl capped thorium(iv) porphyrinoid complex
Source: Royal Society of Chemistry journal article supplement (doi:10.1039/d3cc05283d), 2023-12-22
Supplement: d3cc05283d1.pdf [file d3cc05283d1.pdf]

## Electronic Supplementary Information

### Cyclopentadienyl capped thorium(IV) porphyrinoid complex

Daniel N. Mangel,<sup>a,b,†</sup> James T. Brewster,<sup>a,b,†</sup> Vincent M. Lynch,<sup>a</sup> and Jonathan L. Sessler<sup>a,\*</sup>

<sup>a</sup> Department of Chemistry, The University of Texas at Austin, Austin, Texas 78712, United States.

<sup>b</sup> Chemistry Division, Los Alamos National Laboratory, Los Alamos, New Mexico 87545, United States

#### Materials & General Methods

All reagents and solvents were purchased from commercial supplies and used without further purification. Anhydrous tetrahydrofuran (100 mL Sure/Seal™) was stored over activated molecular sieves then filtered through dried basic aluminum oxide before use. High-resolution mass spectra (HRMS) were measured using an Ion Spec Fourier Transform mass spectrometer (9.4 T). Proton and carbon NMR spectra were recorded using a Varian 400 spectrometer at room temperature and chemical shifts are reported in ppm using TMS or solvent residual signals as internal reference standards. All NMR spectroscopic solvents were purchased from Cambridge Isotope Laboratories. UV-Vis spectra were recorded from 250 to 800 nm using a Varian Cary 5000 spectrophotometer at room temperature. Unless otherwise indicated, a cell length of 10 mm was used for all UV-Vis spectra studies.

Dipyriamethyrin was synthesized as previously reported.<sup>1</sup>

Th(IV)[dipyriamethyrin]Cl<sub>2</sub> (**1**). In an inert atmosphere glove box, a borosilicate scintillation vial was charged with dipyriamethyrin (45 mg, 0.06 mmol) and sodium bis(trimethyl)silylamide (NaHMDS, 21.3 mg, 0.11 mmol, 2.1 equiv.). The solids were dissolved in anhydrous THF (3 mL) and stirred at ambient temperature for 20 minutes. The solution immediately turned purple. The mixture was concentrated under reduced pressure. Drying was continued for 0.5 to 1 h after the bulk of the THF had been removed. This yielded a purple solid with green metallic luster. To this solid, ThCl<sub>4</sub>(DME)<sub>2</sub> (30.6 mg, 0.06 mmol, 1 equiv.) and anhydrous THF (3 mL) were added. The reaction was stirred at ambient temperature overnight, at which point the solution turned from purple to red-purple yielding a bronze-coloured precipitate, which was washed (3 x 7.5 mL) with anhydrous THF: hexanes (1:19, v/v). The resulting solid was taken up in anhydrous THF (20 mL) and cooled to -35° C and held at that temperature for 30 min. The solution was decanted to remove any additional salt that had precipitated. Removing the volatiles

from the decanted THF solution under reduced pressure yielded the product in the form of a powder (62.1 mg, 91% yield). Crystalline material (43 mg, 63%) was obtained by allowing the solution to concentrate to ca. 1 mL then removing the remaining THF: hexanes mixture by decanting with a glass pipette. Single crystals suitable for X-ray diffraction were obtained by slow evaporation of a solution in anhydrous THF: hexanes (1:1, v/v, 10 mL) over one to three days.

Th(IV)[dipyriamethyrin][F][Cp] (**2**).

In an inert atmosphere glove box, a borosilicate scintillation vial was charged with a Teflon-coated magnetic stir bar, Th(IV)[dipyriamethyrin]Cl<sub>2</sub> (**1**) (20 mg, 0.025 mmol), and sodium cyclopentadienyl (4.6 mg, 0.052 mmol, 2.1 equiv.). The solids were stirred in anhydrous THF (3 mL) at ambient temperature for 18 h. The reaction mixture was concentrated under reduced pressure and the resulting solids washed (3 x 7.5 mL) with anhydrous THF: hexanes (1:20, v/v) by vigorously shaking to yield a purple solid. The solid was taken up in THF (20 mL), cooled to -35° C for 30 min, and the solution was decanted to remove any additional salt that had precipitated to yield complex **2** as a purple solid with metallic luster (20.4 mg, 93% yield) (Figure S1). Single crystals suitable for X-ray diffraction analyses were obtained by slow evaporation of the complex **2** in 5 mL of a THF: hexanes (1:10, v/v) mixture. The original solid material was used for the UV-vis and <sup>1</sup>H NMR spectroscopic analyses. <sup>1</sup>H NMR (400 MHz, THF-*d*<sub>8</sub>) δ 7.83-7.61 (m, 2H), 7.51-7.34 (m, 14H), 6.50 (s, 1H), 6.40 (s, 1H), 5.79 (s, 3H), 2.79-2.62 (m, 14H), 1.05 (t, J= 7.5Hz, 6H) 0.78-0.62 (m, 12H).

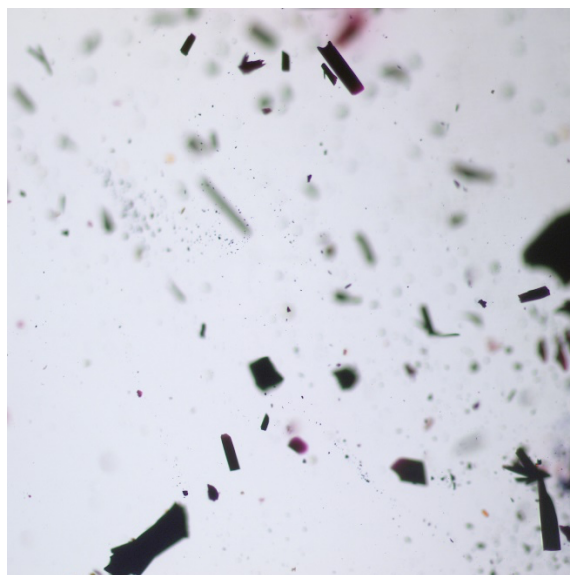

Figure S1 – Pictures of the single crystals of complex **2** used for X-ray diffraction studies.

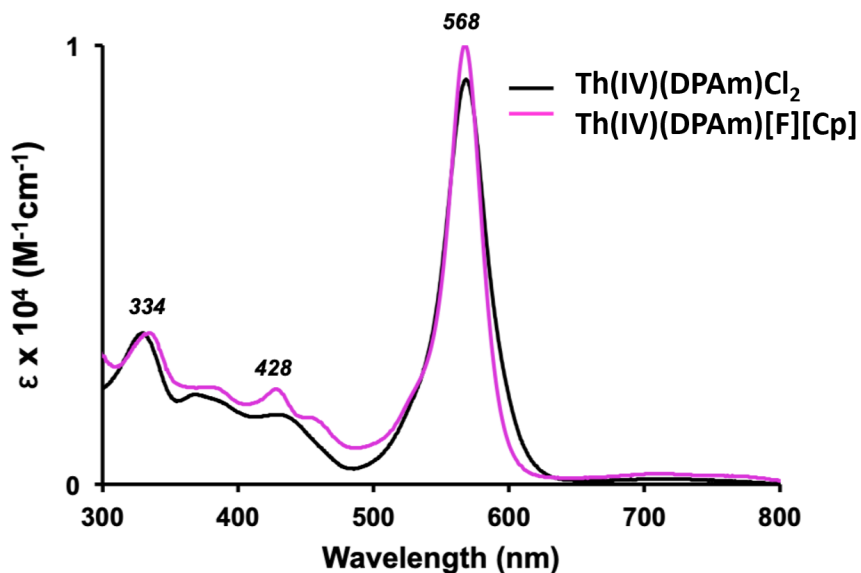

Figure S2 – Overlaid UV-vis spectra of the Th(IV)-dipyriamethyrinCl<sub>2</sub> with the Th(IV)-dipyriamethyrin[F][Cp] complex.

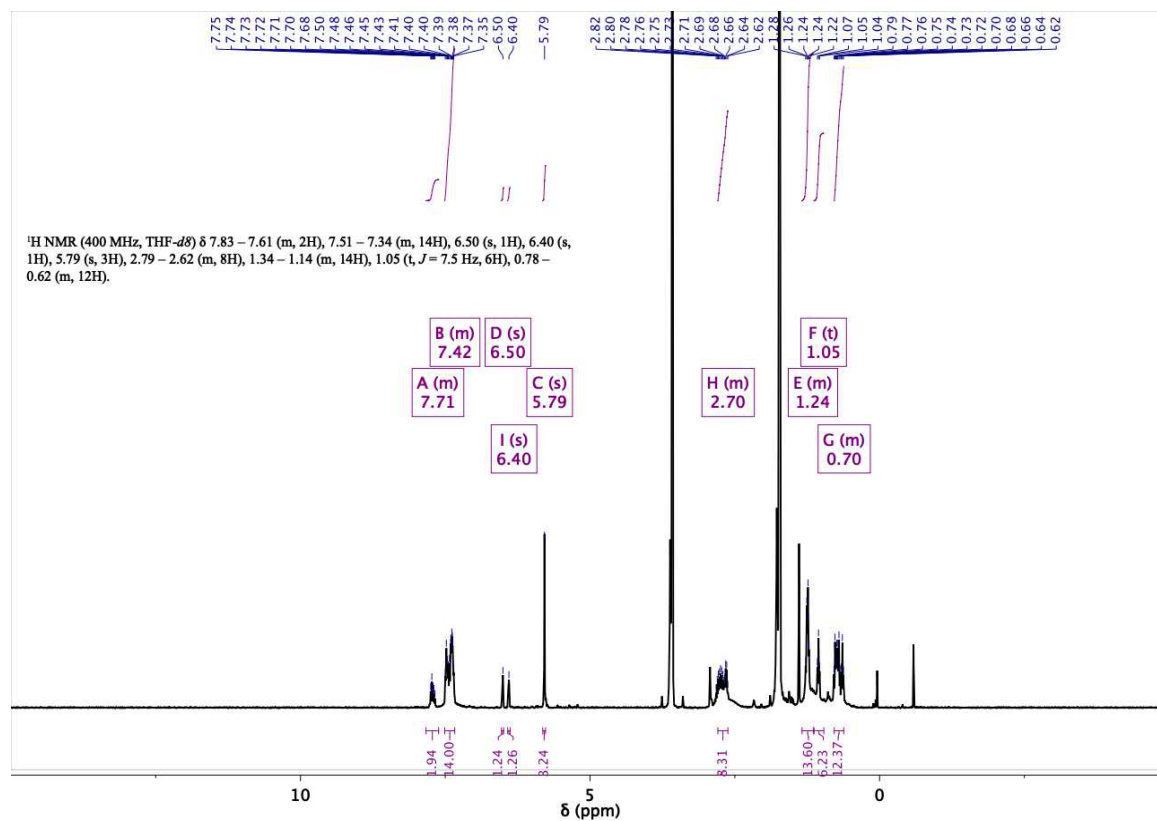

Figure S3: <sup>1</sup>H NMR spectrum of complex **2** in THF-*d*<sub>8</sub>.

#### Th(IV)[dipyriamethyrin][benzoate]<sub>2</sub> (**4**)

In an inert atmosphere glove box, a borosilicate scintillation vial was charged with a Teflon coated magnetic stir bar, Th(IV)[dipyriamethyrin]Cl<sub>2</sub> (**3**) (20 mg, 0.025 mmol), and silver benzoate (5.8 mg, 0.052 mmol, 2.1 equiv.). The solids were dissolved in anhydrous THF (3 mL) and stirred at ambient temperature for 18 h. The reaction mixture was filtered through a pipette filter and concentrated under reduced pressure and the resulting solids washed (3 x 7.5 mL) with anhydrous THF: hexanes (1:20, v/v) by vigorously shaking to yield a purple solid. The solid was taken up in THF (20 mL), cooled to -35° C for 30 min, and the solution was decanted to remove any additional salt that had precipitated. This yielded complex **4** as a purple solid with green metallic luster (20.4 mg, 93% yield). Single crystals suitable for X-ray diffraction analyses were obtained by slow evaporation of the complex **4** in 5 mL of a THF: toluene (1:5, v/v) mixture.

#### Sodium Cyclopentadienide

Under an inert atmosphere, 400 mL of diglyme and 2.29g of sodium (0.1 mole) were added to a 1000 mL round bottom flask. The flask was set reflux (162° C) and 4.62g of dicyclopentadiene was slowly added to the reaction solution. When the hydrogen gas generation stopped, the reactions was deemed complete. The solution was cooled, filtered and washed with hexanes.

### Computational Calculations - Experimental

Density functional theory calculations were carried out using the PBE0 hybrid functional as implemented in the Gaussian 16 quantum chemistry code. 60-electron Stuttgart-Bonn relativistic pseudopotentials were used for Th together with (14s 13p 10d 8f 6g)/[10s 9p 5d 4f 3g] segmented valence basis sets. Dunning's cc-pVTZ basis sets were employed for N, C, O, F, and Cl, and cc-pVDZ for H. Spin-unrestricted calculations were performed. The ultrafine integration grid was employed, as were the default geometry and SCF convergence criteria. No symmetry constraints were imposed. Basis set superposition errors were calculated using the counterpoise correction for the complexation energies.

## Geometries of the Relaxed Structures:

### Complex 2

```
Th -0.0230000000 -0.0010000000 -0.6150000000
F 0.0240000000 0.0620000000 1.4800000000
N -2.8070000000 -0.3600000000 -0.6320000000
N -0.9680000000 -2.5430000000 0.0400000000
N 1.7240000000 -2.1100000000 -0.2340000000
N 2.7530000000 0.3390000000 -0.7830000000
N 0.9340000000 2.5580000000 -0.1640000000
N -1.7530000000 2.1130000000 -0.2880000000
C -3.4670000000 0.7070000000 -1.1410000000
C -4.5660000000 0.3330000000 -1.9910000000
C -4.6180000000 -1.0660000000 -1.9410000000
C -3.5590000000 -1.4690000000 -1.0260000000
C -3.3930000000 -2.7050000000 -0.3610000000
C -2.2270000000 -3.0450000000 0.3730000000
C -2.1200000000 -4.0290000000 1.4360000000
C -0.7550000000 -4.1760000000 1.6910000000
C -0.0940000000 -3.2880000000 0.7680000000
C 1.3170000000 -3.2240000000 0.4300000000
C 2.1950000000 -4.3060000000 0.6770000000
H 1.8270000000 -5.2030000000 1.1820000000
C 3.5100000000 -4.2400000000 0.2170000000
H 4.2040000000 -5.0760000000 0.3890000000
C 3.9330000000 -3.0950000000 -0.4620000000
H 4.9700000000 -2.9850000000 -0.7960000000
C 3.0140000000 -2.0400000000 -0.6540000000
C 3.4150000000 -0.7600000000 -1.2120000000
C 4.4770000000 -0.4500000000 -2.1360000000
C 4.4930000000 0.9470000000 -2.2280000000
C 3.4650000000 1.4170000000 -1.3100000000
C 3.3250000000 2.7030000000 -0.7370000000
C 2.2060000000 3.0920000000 0.0450000000
C 2.1560000000 4.1550000000 1.0350000000
C 0.8080000000 4.3110000000 1.3670000000
C 0.0990000000 3.3520000000 0.5590000000
C -1.3260000000 3.2630000000 0.2950000000
C -2.2010000000 4.3560000000 0.5110000000
H -1.8220000000 5.2790000000 0.9590000000
C -3.5260000000 4.2660000000 0.0830000000
H -4.2150000000 5.1110000000 0.2260000000
C -3.9630000000 3.0880000000 -0.5270000000
H -5.0060000000 2.9650000000 -0.8380000000
C -3.0520000000 2.0200000000 -0.6760000000
C -5.4500000000 1.2330000000 -2.8190000000
H -5.5550000000 0.7980000000 -3.8360000000
H -4.9520000000 2.2130000000 -2.9700000000
C -6.8580000000 1.4490000000 -2.2320000000
H -7.4640000000 2.1160000000 -2.8790000000
H -6.8170000000 1.9020000000 -1.2190000000
H -7.3990000000 0.4870000000 -2.1290000000
C -5.4850000000 -1.9280000000 -2.8260000000
H -6.2390000000 -1.2800000000 -3.3190000000
H -6.0620000000 -2.6650000000 -2.2350000000
C -4.6830000000 -2.6730000000 -3.9090000000
H -4.1300000000 -1.9650000000 -4.5600000000
H -5.3560000000 -3.2770000000 -4.5510000000
H -3.9400000000 -3.3600000000 -3.4560000000
C -4.5150000000 -3.6880000000 -0.3790000000
C -4.3200000000 -4.9820000000 -0.9100000000
```

H -3.3320000000 -5.2480000000 -1.3140000000  
C -5.3680000000 -5.9130000000 -0.9230000000  
H -5.2050000000 -6.9130000000 -1.3520000000  
C -6.6200000000 -5.5730000000 -0.3850000000  
H -7.4390000000 -6.3080000000 -0.3850000000  
C -6.8230000000 -4.2920000000 0.1540000000  
H -7.7990000000 -4.0230000000 0.5840000000  
C -5.7830000000 -3.3520000000 0.1460000000  
H -5.9380000000 -2.3450000000 0.5600000000  
C -3.2160000000 -4.6120000000 2.2950000000  
H -2.7970000000 -5.4550000000 2.8830000000  
H -4.0270000000 -5.0480000000 1.6830000000  
C -3.8130000000 -3.5760000000 3.2660000000  
H -4.2750000000 -2.7320000000 2.7160000000  
H -3.0320000000 -3.1480000000 3.9270000000  
H -4.5940000000 -4.0370000000 3.9060000000  
C -0.1500000000 -5.0300000000 2.7800000000  
H -0.7470000000 -4.8920000000 3.7070000000  
H 0.8640000000 -4.6600000000 3.0330000000  
C -0.0960000000 -6.5350000000 2.4560000000  
H 0.5060000000 -6.7430000000 1.5470000000  
H -1.1100000000 -6.9390000000 2.2630000000  
H 0.3470000000 -7.1090000000 3.2960000000  
C 5.3510000000 -1.4090000000 -2.9050000000  
H 5.4230000000 -1.0630000000 -3.9590000000  
H 4.8650000000 -2.4040000000 -2.9570000000  
C 6.7760000000 -1.5520000000 -2.3390000000  
H 7.3040000000 -0.5770000000 -2.3380000000  
H 7.3770000000 -2.2660000000 -2.9400000000  
H 6.7680000000 -1.9130000000 -1.2900000000  
C 5.2900000000 1.7330000000 -3.2400000000  
H 6.0130000000 1.0480000000 -3.7280000000  
H 5.9010000000 2.5210000000 -2.7570000000  
C 4.4040000000 2.3790000000 -4.3220000000  
H 5.0250000000 2.9040000000 -5.0770000000  
H 3.7100000000 3.1220000000 -3.8800000000  
H 3.7900000000 1.6190000000 -4.8460000000  
C 4.4300000000 3.6910000000 -0.9050000000  
C 5.7320000000 3.4120000000 -0.4350000000  
H 5.9290000000 2.4430000000 0.0470000000  
C 6.7560000000 4.3610000000 -0.5650000000  
H 7.7610000000 4.1370000000 -0.1770000000  
C 6.5010000000 5.5930000000 -1.1900000000  
H 7.3060000000 6.3340000000 -1.2990000000  
C 5.2130000000 5.8760000000 -1.6750000000  
H 5.0080000000 6.8370000000 -2.1690000000  
C 4.1820000000 4.9370000000 -1.5220000000  
H 3.1670000000 5.1610000000 -1.8830000000  
C 3.2980000000 4.8110000000 1.7720000000  
H 2.9080000000 5.6930000000 2.3190000000  
H 4.0620000000 5.2050000000 1.0750000000  
C 3.9710000000 3.8580000000 2.7770000000  
H 4.7870000000 4.3730000000 3.3260000000  
H 4.4070000000 2.9770000000 2.2640000000  
H 3.2410000000 3.4770000000 3.5200000000  
C 0.2640000000 5.2450000000 2.4200000000  
H 0.9180000000 5.1850000000 3.3170000000  
H -0.7290000000 4.8910000000 2.7650000000  
C 0.1730000000 6.7200000000 1.9830000000  
H 1.1690000000 7.1130000000 1.6950000000  
H -0.2220000000 7.3570000000 2.8010000000  
H -0.4860000000 6.8510000000 1.0990000000  
C -0.8560000000 0.9160000000 -3.1990000000

```

H -1.5430000000 1.7700000000 -3.1990000000
C -1.2260000000 -0.4580000000 -3.1930000000
H -2.2470000000 -0.8510000000 -3.1840000000
C -0.0340000000 -1.2360000000 -3.2210000000
H 0.0190000000 -2.3310000000 -3.2230000000
C 1.0710000000 -0.3390000000 -3.2750000000
H 2.1260000000 -0.6190000000 -3.3420000000
C 0.5670000000 0.9910000000 -3.2490000000
H 1.1660000000 1.9070000000 -3.2740000000

```

### Complex 3

```

Th -0.0240000000 -0.0030000000 -0.6230000000
Cl 0.0310000000 0.0720000000 2.0030000000
N -2.8000000000 -0.3610000000 -0.6610000000
N -0.9660000000 -2.5390000000 0.0140000000
N 1.7210000000 -2.1080000000 -0.2680000000
N 2.7450000000 0.3380000000 -0.8090000000
N 0.9290000000 2.5500000000 -0.1850000000
N -1.7520000000 2.1070000000 -0.3190000000
C -3.4640000000 0.7020000000 -1.1730000000
C -4.5660000000 0.3230000000 -2.0170000000
C -4.6170000000 -1.0750000000 -1.9560000000
C -3.5560000000 -1.4720000000 -1.0430000000
C -3.3930000000 -2.7010000000 -0.3640000000
C -2.2240000000 -3.0350000000 0.3640000000
C -2.1110000000 -4.0130000000 1.4320000000
C -0.7430000000 -4.1670000000 1.6700000000
C -0.0900000000 -3.2890000000 0.7350000000
C 1.3170000000 -3.2280000000 0.3880000000
C 2.1920000000 -4.3150000000 0.6220000000
H 1.8210000000 -5.2150000000 1.1200000000
C 3.5060000000 -4.2480000000 0.1600000000
H 4.1980000000 -5.0870000000 0.3230000000
C 3.9290000000 -3.0970000000 -0.5080000000
H 4.9650000000 -2.9850000000 -0.8420000000
C 3.0120000000 -2.0390000000 -0.6900000000
C 3.4130000000 -0.7570000000 -1.2390000000
C 4.4780000000 -0.4420000000 -2.1560000000
C 4.4920000000 0.9560000000 -2.2410000000
C 3.4600000000 1.4200000000 -1.3260000000
C 3.3230000000 2.7000000000 -0.7400000000
C 2.2010000000 3.0810000000 0.0380000000
C 2.1460000000 4.1370000000 1.0340000000
C 0.7960000000 4.2980000000 1.3530000000
C 0.0930000000 3.3470000000 0.5330000000
C -1.3300000000 3.2610000000 0.2600000000
C -2.2020000000 4.3560000000 0.4650000000
H -1.8220000000 5.2800000000 0.9110000000
C -3.5250000000 4.2670000000 0.0310000000
H -4.2140000000 5.1130000000 0.1670000000
C -3.9600000000 3.0860000000 -0.5750000000
H -5.0010000000 2.9620000000 -0.8890000000
C -3.0500000000 2.0160000000 -0.7130000000
C -5.4540000000 1.2170000000 -2.8460000000
H -5.5640000000 0.7730000000 -3.8590000000
H -4.9580000000 2.1960000000 -3.0070000000
C -6.8590000000 1.4350000000 -2.2530000000
H -7.4690000000 2.0960000000 -2.9020000000
H -6.8130000000 1.8960000000 -1.2440000000
H -7.3990000000 0.4730000000 -2.1410000000

```

C -5.4890000000 -1.9450000000 -2.8290000000  
H -6.2420000000 -1.3020000000 -3.3280000000  
H -6.0660000000 -2.6740000000 -2.2270000000  
C -4.6910000000 -2.7050000000 -3.9050000000  
H -4.1370000000 -2.0060000000 -4.5650000000  
H -5.3660000000 -3.3150000000 -4.5390000000  
H -3.9490000000 -3.3890000000 -3.4450000000  
C -4.5220000000 -3.6770000000 -0.3620000000  
C -4.3380000000 -4.9780000000 -0.8790000000  
H -3.3560000000 -5.2570000000 -1.2860000000  
C -5.3930000000 -5.9020000000 -0.8740000000  
H -5.2400000000 -6.9090000000 -1.2910000000  
C -6.6390000000 -5.5480000000 -0.3310000000  
H -7.4630000000 -6.2770000000 -0.3160000000  
C -6.8290000000 -4.2580000000 0.1950000000  
H -7.8000000000 -3.9770000000 0.6280000000  
C -5.7830000000 -3.3260000000 0.1680000000  
H -5.9280000000 -2.3130000000 0.5720000000  
C -3.2000000000 -4.5790000000 2.3100000000  
H -2.7790000000 -5.4170000000 2.9030000000  
H -4.0210000000 -5.0170000000 1.7120000000  
C -3.7770000000 -3.5260000000 3.2750000000  
H -4.2440000000 -2.6880000000 2.7200000000  
H -2.9830000000 -3.0910000000 3.9160000000  
H -4.5490000000 -3.9750000000 3.9340000000  
C -0.1290000000 -5.0150000000 2.7570000000  
H -0.7110000000 -4.8650000000 3.6910000000  
H 0.8910000000 -4.6480000000 2.9920000000  
C -0.0880000000 -6.5230000000 2.4460000000  
H 0.5000000000 -6.7440000000 1.5310000000  
H -1.1080000000 -6.9230000000 2.2720000000  
H 0.3630000000 -7.0930000000 3.2850000000  
C 5.3600000000 -1.3930000000 -2.9260000000  
H 5.4390000000 -1.0400000000 -3.9760000000  
H 4.8760000000 -2.3900000000 -2.9880000000  
C 6.7810000000 -1.5380000000 -2.3500000000  
H 7.3060000000 -0.5610000000 -2.3390000000  
H 7.3880000000 -2.2460000000 -2.9520000000  
H 6.7660000000 -1.9050000000 -1.3030000000  
C 5.2950000000 1.7510000000 -3.2420000000  
H 6.0190000000 1.0690000000 -3.7340000000  
H 5.9040000000 2.5330000000 -2.7490000000  
C 4.4140000000 2.4080000000 -4.3210000000  
H 5.0380000000 2.9390000000 -5.0690000000  
H 3.7190000000 3.1480000000 -3.8750000000  
H 3.8010000000 1.6530000000 -4.8560000000  
C 4.4330000000 3.6860000000 -0.8910000000  
C 5.7300000000 3.3960000000 -0.4150000000  
H 5.9200000000 2.4220000000 0.0590000000  
C 6.7590000000 4.3420000000 -0.5290000000  
H 7.7600000000 4.1100000000 -0.1360000000  
C 6.5130000000 5.5810000000 -1.1440000000  
H 7.3230000000 6.3200000000 -1.2390000000  
C 5.2300000000 5.8740000000 -1.6330000000  
H 5.0320000000 6.8410000000 -2.1190000000  
C 4.1940000000 4.9380000000 -1.4980000000  
H 3.1830000000 5.1700000000 -1.8630000000  
C 3.2840000000 4.7820000000 1.7880000000  
H 2.8910000000 5.6600000000 2.3410000000  
H 4.0550000000 5.1800000000 1.1020000000  
C 3.9430000000 3.8150000000 2.7900000000  
H 4.7530000000 4.3220000000 3.3540000000  
H 4.3820000000 2.9400000000 2.2700000000



H 3.2020000000 3.4260000000 3.5180000000  
C 0.2430000000 5.2250000000 2.4090000000  
H 0.8860000000 5.1520000000 3.3120000000  
H -0.7550000000 4.8700000000 2.7380000000  
C 0.1640000000 6.7030000000 1.9840000000  
H 1.1640000000 7.0960000000 1.7120000000  
H -0.2390000000 7.3340000000 2.8040000000  
H -0.4850000000 6.8470000000 1.0950000000  
C -0.8560000000 0.9110000000 -3.1880000000  
H -1.5450000000 1.7630000000 -3.1900000000  
C -1.2240000000 -0.4650000000 -3.1820000000  
H -2.2440000000 -0.8590000000 -3.1760000000  
C -0.0310000000 -1.2400000000 -3.2070000000  
H 0.0240000000 -2.3350000000 -3.2080000000  
C 1.0720000000 -0.3410000000 -3.2630000000  
H 2.1280000000 -0.6180000000 -3.3330000000  
C 0.5660000000 0.9880000000 -3.2370000000  
H 1.1640000000 1.9060000000 -3.2620000000

## Structural Information and Single Crystal X-ray Experimental

Crystallographic Material for Complex **2**.

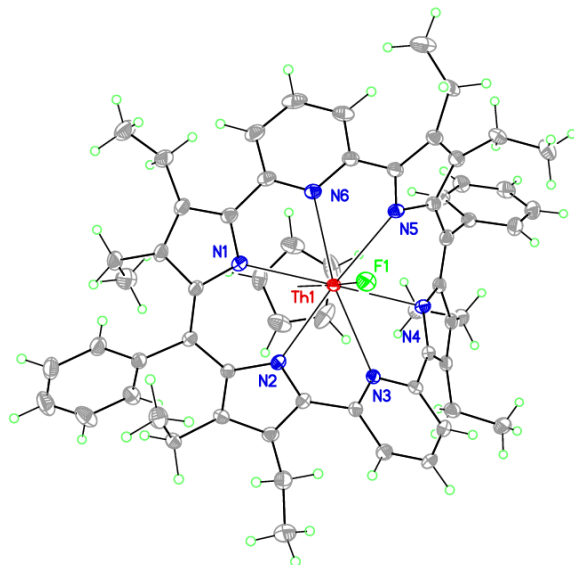

Figure S4. View of the Th ion complex in **2** showing the heteroatom labeling scheme. Displacement ellipsoids are scaled to the 50% probability level. CCDC no. 2288552.

X-ray experimental for  $[(C_{56}H_{56}N_6)Th(C_5H_5)]^+ F^-$  (**2**): Crystals grew as black prisms by slow evaporation from hexanes/THF (20:1). The data crystal was separated from a cluster of crystals and had approximate dimensions; 0.20 x 0.077 x 0.071 mm. The data were collected on an Agilent Technologies SuperNova Dual Source diffractometer using a  $\mu$ -focus Cu  $K\alpha$  radiation source ( $\lambda = 1.5418 \text{ \AA}$ ) with collimating mirror monochromators. A total of 1835 frames of data were collected using  $\omega$ -scans with a scan range of  $1^\circ$  and a counting time of 3 seconds per frame for frames collected with a detector offset of  $\pm 41.6^\circ$  and 10 seconds per frame with frames collected with a detector offset of  $112.0^\circ$ . The data was collected at 100 K using an Oxford Cryostream low temperature device. Data collection, unit cell refinement and data reduction were performed using Rigaku Oxford Diffraction's CrysAlisPro V 1.171.41.70a.<sup>2</sup> The structure was solved by direct methods using SHELXT 2 and refined by full-matrix least-squares on F2 with anisotropic

displacement parameters for the non-H atoms using SHELXL-2018/3.<sup>4</sup> Structure analysis was aided by use of the programs PLATON 4 and OLEX2.<sup>5,6</sup> The hydrogen atoms on the carbon atoms were calculated in ideal positions with isotropic displacement parameters set to 1.2xUeq of the attached atom (1.5xUeq for methyl hydrogen atoms).

The function,  $\sum w(|F_o|^2 - |F_c|^2)^2$ , was minimized, where  $w = 1/[(\sigma(F_o))^2 + (0.0529 \cdot P)^2 + (9.5167 \cdot P)]$  and  $P = (|F_o|^2 + 2|F_c|^2)/3$ . Rw(F2) refined to 0.0828, with R(F) equal to 0.0307 and a goodness of fit, S, = 1.06. Definitions used for calculating R(F), Rw(F2) and the goodness of fit, S, are given below.<sup>7</sup> The data were checked for secondary extinction effects but no correction was necessary. Neutral atom scattering factors and values used to calculate the linear absorption coefficient are from the International Tables for X-ray Crystallography (1992).<sup>8</sup> All figures were generated using SHELXTL/PC.<sup>9</sup>

Crystallographic Material for Complex **4**.

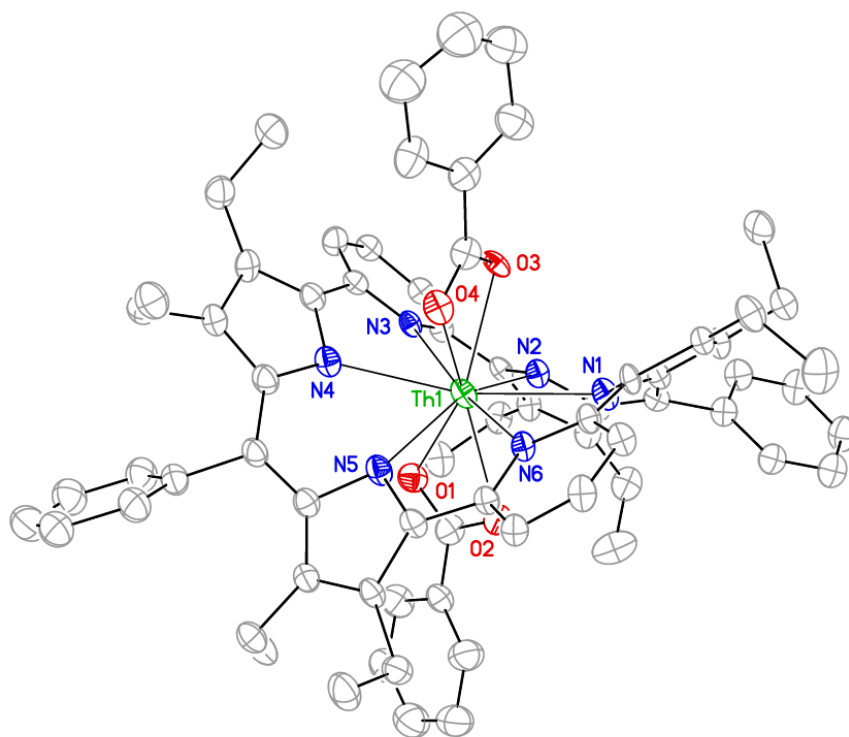

Figure S5. View of the Th complex in **4** showing the heteroatom labeling scheme. Displacement ellipsoids are scaled to the 30% probability level. CCDC no. 2288553

X-ray Experimental for  $(C_{56}H_{56}N_6)Th(C_7H_5O_2)_2$  (**4**): Crystals grew as long, thin black needles by slow evaporation from THF. The data crystal was cut from a longer crystal and had approximate dimensions; 0.20 x 0.039 x 0.031 mm. The data were collected on an Agilent Technologies SuperNova Dual Source diffractometer using a  $\mu$ -focus Cu K $\alpha$  radiation source ( $\lambda = 1.5418 \text{ \AA}$ ) with collimating mirror monochromators. A total of 964 frames of data were collected using  $\omega$ -scans with a scan range of  $1^\circ$  and a counting time of 29.5 seconds per frame for frames collected with a detector offset of  $-42.4^\circ$  and 97.5 seconds per frame with frames collected with a detector offset of  $106.6^\circ$ . The data were collected at

100 K using an Oxford Cryostream low temperature device. Details of crystal data, data collection and structure refinement are listed in Table 1. Data collection, unit cell refinement and data reduction were performed using Rigaku Oxford Diffraction's CrysAlisPro V 1.171.40.53.<sup>1</sup> The structure was solved by direct methods using SHELXT<sup>2</sup> and refined by full-matrix least-squares on  $F^2$  with anisotropic displacement parameters for the non-H atoms using SHELXL-2016/6.<sup>3</sup> Structure analysis was aided by use of the programs PLATON<sup>4</sup>, OLEX2<sup>5</sup> and WinGX.<sup>6</sup> The hydrogen atoms on the carbon atoms were calculated in ideal positions with isotropic displacement parameters set to 1.2xUeq of the attached atom (1.5xUeq for methyl hydrogen atoms).

Two molecules of what appeared to be THF were disordered. The contributions to the scattering factors due to this solvent molecule were removed by use of the utility SQUEEZE<sup>7</sup> in PLATON. PLATON was used as incorporated in WinGX.

The function,  $\sum w(|F_O|^2 - |F_C|^2)^2$ , was minimized, where  $w = 1/[(s(F_O))^2 + (0.0745*P)^2]$  and  $P = (|F_O|^2 + 2|F_C|^2)/3$ .  $R_w(F^2)$  refined to 0.278, with  $R(F)$  equal to 0.1056 and a goodness of fit,  $S$ , = 1.06. Definitions used for calculating  $R(F)$ ,  $R_w(F^2)$  and the goodness of fit,  $S$ , are given below.<sup>8</sup> The data were checked for secondary extinction effects but no correction was necessary. Neutral atom scattering factors and values used to calculate the linear absorption coefficient are from the International Tables for X-ray Crystallography (1992).<sup>9</sup> All figures were generated using SHELXTL/PC.<sup>10</sup>

Putative structure of complex **3**

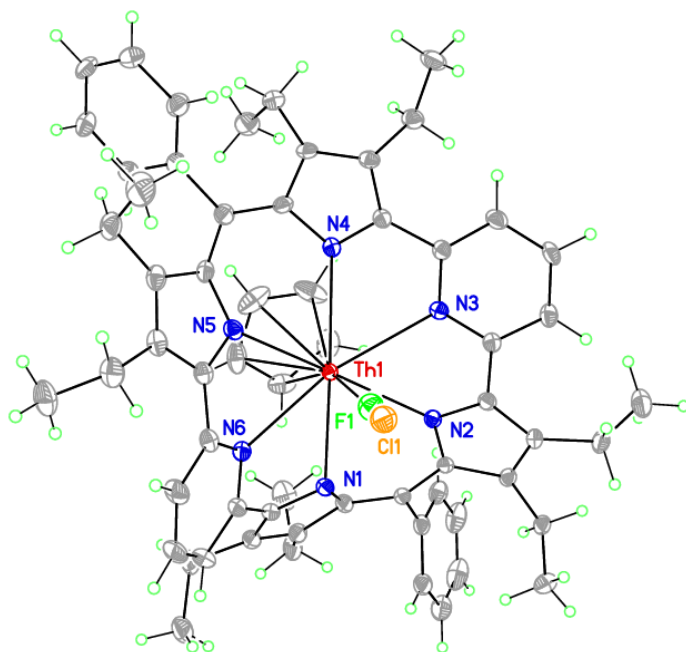

Figure S6. View of the Th ion complex in **3** showing the heteroatom labeling scheme. Displacement ellipsoids are scaled to the 50% probability level. There is a mix of the F ion and Cl ion salt in the data crystal. The site occupancy for Cl ion is approximately 6%. CCDC no. 2288552.

Crystal data and structure refinement for complex **2**.

|                                   |                                                     |                  |
|-----------------------------------|-----------------------------------------------------|------------------|
| Empirical formula                 | C <sub>61</sub> H <sub>61</sub> F N <sub>6</sub> Th |                  |
| Formula weight                    | 1129.19                                             |                  |
| Temperature                       | 100(2) K                                            |                  |
| Wavelength                        | 1.54184 Å                                           |                  |
| Crystal system                    | monoclinic                                          |                  |
| Space group                       | P 21/c                                              |                  |
| Unit cell dimensions              | a = 16.63492(9) Å                                   | α = 90°.         |
|                                   | b = 11.85014(7) Å                                   | β = 90.9154(5)°. |
|                                   | c = 24.83906(14) Å                                  | γ = 90°.         |
| Volume                            | 4895.80(5) Å <sup>3</sup>                           |                  |
| Z                                 | 4                                                   |                  |
| Density (calculated)              | 1.532 Mg/m <sup>3</sup>                             |                  |
| Absorption coefficient            | 10.218 mm <sup>-1</sup>                             |                  |
| F(000)                            | 2272                                                |                  |
| Crystal size                      | 0.200 x 0.077 x 0.071 mm <sup>3</sup>               |                  |
| Theta range for data collection   | 3.559 to 75.779°.                                   |                  |
| Index ranges                      | -19 ≤ h ≤ 20, -14 ≤ k ≤ 12, -31 ≤ l ≤ 28            |                  |
| Reflections collected             | 51244                                               |                  |
| Independent reflections           | 10134 [R(int) = 0.0337]                             |                  |
| Completeness to theta = 67.684°   | 100.0 %                                             |                  |
| Absorption correction             | Gaussian and multi-scan                             |                  |
| Max. and min. transmission        | 1.00 and 0.421                                      |                  |
| Refinement method                 | Full-matrix least-squares on F <sup>2</sup>         |                  |
| Data / restraints / parameters    | 10134 / 0 / 630                                     |                  |
| Goodness-of-fit on F <sup>2</sup> | 1.062                                               |                  |
| Final R indices [I > 2σ(I)]       | R1 = 0.0307, wR2 = 0.0819                           |                  |
| R indices (all data)              | R1 = 0.0315, wR2 = 0.0828                           |                  |
| Extinction coefficient            | n/a                                                 |                  |
| Largest diff. peak and hole       | 1.579 and -0.952 e.Å <sup>-3</sup>                  |                  |

Atomic coordinates ( $\times 10^4$ ) and equivalent isotropic displacement parameters ( $\text{\AA}^2 \times 10^3$ )  
 For complex **2**.  $U(\text{eq})$  is defined as one third of the trace of the orthogonalized  $U^{ij}$  tensor.

|     | x        | y        | z       | $U(\text{eq})$ |
|-----|----------|----------|---------|----------------|
| Th1 | 7596(1)  | 6222(1)  | 7674(1) | 13(1)          |
| F1  | 8597(2)  | 6809(2)  | 8217(1) | 37(1)          |
| N1  | 6528(2)  | 6240(2)  | 8517(1) | 17(1)          |
| N2  | 7594(2)  | 4396(2)  | 8360(1) | 15(1)          |
| N3  | 8711(2)  | 4543(2)  | 7592(1) | 15(1)          |
| N4  | 8595(2)  | 6145(2)  | 6774(1) | 17(1)          |
| N5  | 7879(2)  | 8172(2)  | 7124(1) | 17(1)          |
| N6  | 7053(2)  | 8214(2)  | 8038(1) | 18(1)          |
| C1  | 6100(2)  | 7185(3)  | 8524(1) | 18(1)          |
| C2  | 5268(2)  | 7010(3)  | 8626(1) | 22(1)          |
| C3  | 5189(2)  | 5864(3)  | 8709(1) | 21(1)          |
| C4  | 5993(2)  | 5392(3)  | 8666(1) | 17(1)          |
| C5  | 6278(2)  | 4323(3)  | 8809(1) | 16(1)          |
| C6  | 7079(2)  | 3959(3)  | 8744(1) | 15(1)          |
| C7  | 7504(2)  | 3156(3)  | 9080(1) | 16(1)          |
| C8  | 8290(2)  | 3136(3)  | 8901(1) | 18(1)          |
| C9  | 8305(2)  | 3861(3)  | 8445(1) | 16(1)          |
| C10 | 8914(2)  | 3928(3)  | 8032(1) | 16(1)          |
| C11 | 9632(2)  | 3302(3)  | 8048(1) | 20(1)          |
| C12 | 10116(2) | 3264(3)  | 7602(1) | 21(1)          |
| C13 | 9877(2)  | 3832(3)  | 7144(2) | 22(1)          |
| C14 | 9179(2)  | 4470(3)  | 7156(1) | 16(1)          |
| C15 | 8891(2)  | 5118(3)  | 6693(1) | 16(1)          |
| C16 | 8865(2)  | 4780(3)  | 6141(1) | 18(1)          |
| C17 | 8534(2)  | 5675(3)  | 5863(1) | 18(1)          |
| C18 | 8401(2)  | 6562(3)  | 6262(1) | 17(1)          |
| C19 | 8216(2)  | 7687(3)  | 6185(1) | 19(1)          |
| C20 | 8112(2)  | 8474(3)  | 6611(1) | 18(1)          |
| C21 | 8270(2)  | 9664(3)  | 6590(1) | 21(1)          |
| C22 | 8160(2)  | 10074(3) | 7101(1) | 21(1)          |
| C23 | 7879(2)  | 9148(3)  | 7412(1) | 18(1)          |



|     |         |          |          |       |
|-----|---------|----------|----------|-------|
| C24 | 7452(2) | 9176(3)  | 7914(1)  | 19(1) |
| C25 | 7372(2) | 10152(3) | 8231(2)  | 26(1) |
| C26 | 6824(2) | 10156(3) | 8644(2)  | 30(1) |
| C27 | 6359(2) | 9216(3)  | 8734(1)  | 26(1) |
| C28 | 6509(2) | 8250(3)  | 8429(1)  | 19(1) |
| C29 | 4615(2) | 7892(3)  | 8574(2)  | 29(1) |
| C30 | 4302(3) | 8371(4)  | 9104(2)  | 40(1) |
| C31 | 4383(2) | 5286(3)  | 8753(2)  | 28(1) |
| C32 | 4132(2) | 4706(4)  | 8230(2)  | 36(1) |
| C33 | 5718(2) | 3529(3)  | 9080(1)  | 20(1) |
| C34 | 5497(2) | 2529(3)  | 8829(2)  | 24(1) |
| C35 | 4990(2) | 1765(4)  | 9082(2)  | 34(1) |
| C36 | 4708(2) | 2019(4)  | 9589(2)  | 39(1) |
| C37 | 4919(2) | 3013(4)  | 9842(2)  | 35(1) |
| C38 | 5423(2) | 3775(3)  | 9590(2)  | 25(1) |
| C39 | 7254(2) | 2540(3)  | 9582(1)  | 19(1) |
| C40 | 7385(2) | 3240(3)  | 10092(1) | 25(1) |
| C41 | 8969(2) | 2516(3)  | 9182(1)  | 23(1) |
| C42 | 9104(3) | 1309(3)  | 8996(2)  | 33(1) |
| C43 | 9081(2) | 3643(3)  | 5914(2)  | 23(1) |
| C44 | 9878(3) | 3615(3)  | 5613(2)  | 30(1) |
| C45 | 8270(2) | 5604(3)  | 5279(1)  | 24(1) |
| C46 | 7368(2) | 5373(3)  | 5226(2)  | 29(1) |
| C47 | 8115(2) | 8114(3)  | 5620(1)  | 19(1) |
| C48 | 8766(2) | 8257(3)  | 5279(1)  | 26(1) |
| C49 | 8648(2) | 8653(3)  | 4757(2)  | 29(1) |
| C50 | 7889(3) | 8868(3)  | 4565(2)  | 28(1) |
| C51 | 7233(2) | 8714(3)  | 4895(2)  | 25(1) |
| C52 | 7346(2) | 8367(3)  | 5426(1)  | 21(1) |
| C53 | 8550(2) | 10389(3) | 6132(2)  | 27(1) |
| C54 | 9465(3) | 10448(4) | 6090(2)  | 42(1) |
| C55 | 8299(2) | 11288(3) | 7261(2)  | 27(1) |
| C56 | 7547(3) | 12027(3) | 7193(2)  | 37(1) |
| C57 | 6109(2) | 6491(3)  | 7089(2)  | 32(1) |
| C58 | 5955(2) | 5577(3)  | 7422(1)  | 27(1) |
| C59 | 6433(2) | 4665(3)  | 7258(2)  | 32(1) |

|     |         |         |         |       |
|-----|---------|---------|---------|-------|
| C60 | 6865(2) | 5036(4) | 6809(2) | 37(1) |
| C61 | 6657(3) | 6151(4) | 6708(2) | 40(1) |

---

## Bond lengths [Å] and angles [°] for complex 2.

---

|         |          |         |          |
|---------|----------|---------|----------|
| Th1-F1  | 2.235(3) | C7-C8   | 1.389(4) |
| Th1-N6  | 2.690(3) | C7-C39  | 1.509(4) |
| Th1-N3  | 2.728(3) | C8-C9   | 1.421(4) |
| Th1-N5  | 2.731(3) | C8-C41  | 1.510(4) |
| Th1-N2  | 2.752(3) | C9-C10  | 1.456(4) |
| Th1-N1  | 2.767(3) | C10-C11 | 1.406(4) |
| Th1-N4  | 2.809(3) | C11-C12 | 1.380(5) |
| Th1-C60 | 2.826(4) | C11-H11 | 0.95     |
| Th1-C61 | 2.845(4) | C12-C13 | 1.376(5) |
| Th1-C59 | 2.856(4) | C12-H12 | 0.95     |
| Th1-C57 | 2.868(4) | C13-C14 | 1.387(5) |
| Th1-C58 | 2.895(3) | C13-H13 | 0.95     |
| N1-C1   | 1.328(4) | C14-C15 | 1.456(4) |
| N1-C4   | 1.397(4) | C15-C16 | 1.429(4) |
| N2-C9   | 1.355(4) | C16-C17 | 1.375(5) |
| N2-C6   | 1.393(4) | C16-C43 | 1.507(4) |
| N3-C14  | 1.348(4) | C17-C18 | 1.464(4) |
| N3-C10  | 1.351(4) | C17-C45 | 1.512(4) |
| N4-C15  | 1.329(4) | C18-C19 | 1.381(5) |
| N4-C18  | 1.397(4) | C19-C20 | 1.422(5) |
| N5-C23  | 1.360(4) | C19-C47 | 1.498(4) |
| N5-C20  | 1.384(4) | C20-C21 | 1.436(5) |
| N6-C28  | 1.339(4) | C21-C22 | 1.374(5) |
| N6-C24  | 1.356(4) | C21-C53 | 1.506(5) |
| C1-C2   | 1.428(5) | C22-C23 | 1.426(5) |
| C1-C28  | 1.454(5) | C22-C55 | 1.510(4) |
| C2-C3   | 1.379(5) | C23-C24 | 1.445(5) |
| C2-C29  | 1.511(5) | C24-C25 | 1.407(5) |
| C3-C4   | 1.455(4) | C25-C26 | 1.382(5) |
| C3-C31  | 1.511(5) | C25-H25 | 0.95     |
| C4-C5   | 1.397(4) | C26-C27 | 1.377(6) |
| C5-C6   | 1.413(4) | C26-H26 | 0.95     |
| C5-C33  | 1.492(4) | C27-C28 | 1.396(5) |
| C6-C7   | 1.442(4) | C27-H27 | 0.95     |

|          |          |          |          |
|----------|----------|----------|----------|
| C29-C30  | 1.534(6) | C43-H43A | 0.99     |
| C29-H29A | 0.99     | C43-H43B | 0.99     |
| C29-H29B | 0.99     | C44-H44A | 0.98     |
| C30-H30A | 0.98     | C44-H44B | 0.98     |
| C30-H30B | 0.98     | C44-H44C | 0.98     |
| C30-H30C | 0.98     | C45-C46  | 1.528(5) |
| C31-C32  | 1.522(6) | C45-H45A | 0.99     |
| C31-H31A | 0.99     | C45-H45B | 0.99     |
| C31-H31B | 0.99     | C46-H46A | 0.98     |
| C32-H32A | 0.98     | C46-H46B | 0.98     |
| C32-H32B | 0.98     | C46-H46C | 0.98     |
| C32-H32C | 0.98     | C47-C52  | 1.392(5) |
| C33-C34  | 1.386(5) | C47-C48  | 1.397(5) |
| C33-C38  | 1.398(5) | C48-C49  | 1.389(5) |
| C34-C35  | 1.393(5) | C48-H48  | 0.95     |
| C34-H34  | 0.95     | C49-C50  | 1.367(6) |
| C35-C36  | 1.384(7) | C49-H49  | 0.95     |
| C35-H35  | 0.95     | C50-C51  | 1.388(6) |
| C36-C37  | 1.378(7) | C50-H50  | 0.95     |
| C36-H36  | 0.95     | C51-C52  | 1.391(5) |
| C37-C38  | 1.387(5) | C51-H51  | 0.95     |
| C37-H37  | 0.95     | C52-H52  | 0.95     |
| C38-H38  | 0.95     | C53-C54  | 1.529(5) |
| C39-C40  | 1.528(5) | C53-H53A | 0.99     |
| C39-H39A | 0.99     | C53-H53B | 0.99     |
| C39-H39B | 0.99     | C54-H54A | 0.98     |
| C40-H40A | 0.98     | C54-H54B | 0.98     |
| C40-H40B | 0.98     | C54-H54C | 0.98     |
| C40-H40C | 0.98     | C55-C56  | 1.533(5) |
| C41-C42  | 1.521(5) | C55-H55A | 0.99     |
| C41-H41A | 0.99     | C55-H55B | 0.99     |
| C41-H41B | 0.99     | C56-H56A | 0.98     |
| C42-H42A | 0.98     | C56-H56B | 0.98     |
| C42-H42B | 0.98     | C56-H56C | 0.98     |
| C42-H42C | 0.98     | C57-C61  | 1.385(7) |
| C43-C44  | 1.531(5) | C57-C58  | 1.388(6) |

|            |            |             |            |
|------------|------------|-------------|------------|
| C57-H57    | 0.95       | C59-H59     | 0.95       |
| C58-C59    | 1.406(6)   | C60-C61     | 1.387(7)   |
| C58-H58    | 0.95       | C60-H60     | 0.95       |
| C59-C60    | 1.406(6)   | C61-H61     | 0.95       |
| F1-Th1-N6  | 77.03(8)   | N5-Th1-C61  | 72.46(10)  |
| F1-Th1-N3  | 76.81(8)   | N2-Th1-C61  | 119.50(10) |
| N6-Th1-N3  | 153.82(8)  | N1-Th1-C61  | 106.74(11) |
| F1-Th1-N5  | 84.61(8)   | N4-Th1-C61  | 69.58(11)  |
| N6-Th1-N5  | 59.11(8)   | C60-Th1-C61 | 28.32(14)  |
| N3-Th1-N5  | 117.18(8)  | F1-Th1-C59  | 155.95(10) |
| F1-Th1-N2  | 83.13(8)   | N6-Th1-C59  | 117.34(10) |
| N6-Th1-N2  | 118.60(8)  | N3-Th1-C59  | 87.66(10)  |
| N3-Th1-N2  | 58.74(8)   | N5-Th1-C59  | 119.09(10) |
| N5-Th1-N2  | 167.70(8)  | N2-Th1-C59  | 73.08(10)  |
| F1-Th1-N1  | 91.29(9)   | N1-Th1-C59  | 80.78(11)  |
| N6-Th1-N1  | 61.05(8)   | N4-Th1-C59  | 95.53(11)  |
| N3-Th1-N1  | 120.48(8)  | C60-Th1-C59 | 28.65(13)  |
| N5-Th1-N1  | 119.37(8)  | C61-Th1-C59 | 46.77(12)  |
| N2-Th1-N1  | 62.03(8)   | F1-Th1-C57  | 154.03(10) |
| F1-Th1-N4  | 92.62(8)   | N6-Th1-C57  | 77.33(10)  |
| N6-Th1-N4  | 120.14(8)  | N3-Th1-C57  | 128.67(10) |
| N3-Th1-N4  | 60.37(8)   | N5-Th1-C57  | 78.81(10)  |
| N5-Th1-N4  | 61.29(8)   | N2-Th1-C57  | 113.02(10) |
| N2-Th1-N4  | 118.26(7)  | N1-Th1-C57  | 79.83(11)  |
| N1-Th1-N4  | 176.08(8)  | N4-Th1-C57  | 96.69(11)  |
| F1-Th1-C60 | 156.94(10) | C60-Th1-C57 | 46.56(12)  |
| N6-Th1-C60 | 123.28(11) | C61-Th1-C57 | 28.05(14)  |
| N3-Th1-C60 | 82.26(10)  | C59-Th1-C57 | 46.67(11)  |
| N5-Th1-C60 | 96.60(12)  | F1-Th1-C58  | 154.62(9)  |
| N2-Th1-C60 | 94.29(12)  | N6-Th1-C58  | 89.05(10)  |
| N1-Th1-C60 | 107.79(10) | N3-Th1-C58  | 115.54(10) |
| N4-Th1-C60 | 68.36(10)  | N5-Th1-C58  | 106.50(10) |
| F1-Th1-C61 | 155.70(10) | N2-Th1-C58  | 85.19(10)  |
| N6-Th1-C61 | 97.24(12)  | N1-Th1-C58  | 63.34(9)   |
| N3-Th1-C61 | 106.26(12) | N4-Th1-C58  | 112.75(9)  |

|             |            |             |          |
|-------------|------------|-------------|----------|
| C60-Th1-C58 | 46.45(10)  | C6-C5-C33   | 117.1(3) |
| C61-Th1-C58 | 46.02(11)  | N2-C6-C5    | 123.8(3) |
| C59-Th1-C58 | 28.31(11)  | N2-C6-C7    | 110.0(3) |
| C57-Th1-C58 | 27.87(12)  | C5-C6-C7    | 126.1(3) |
| C1-N1-C4    | 105.0(3)   | C8-C7-C6    | 106.2(3) |
| C1-N1-Th1   | 111.5(2)   | C8-C7-C39   | 122.0(3) |
| C4-N1-Th1   | 127.9(2)   | C6-C7-C39   | 131.2(3) |
| C9-N2-C6    | 105.2(3)   | C7-C8-C9    | 105.9(3) |
| C9-N2-Th1   | 117.1(2)   | C7-C8-C41   | 124.1(3) |
| C6-N2-Th1   | 136.34(19) | C9-C8-C41   | 129.8(3) |
| C14-N3-C10  | 118.4(3)   | N2-C9-C8    | 112.4(3) |
| C14-N3-Th1  | 120.6(2)   | N2-C9-C10   | 118.6(3) |
| C10-N3-Th1  | 119.6(2)   | C8-C9-C10   | 128.0(3) |
| C15-N4-C18  | 105.5(3)   | N3-C10-C11  | 120.6(3) |
| C15-N4-Th1  | 112.0(2)   | N3-C10-C9   | 115.5(3) |
| C18-N4-Th1  | 125.6(2)   | C11-C10-C9  | 123.5(3) |
| C23-N5-C20  | 105.5(3)   | C12-C11-C10 | 120.1(3) |
| C23-N5-Th1  | 117.0(2)   | C12-C11-H11 | 120.0    |
| C20-N5-Th1  | 137.1(2)   | C10-C11-H11 | 120.0    |
| C28-N6-C24  | 118.5(3)   | C13-C12-C11 | 118.9(3) |
| C28-N6-Th1  | 120.4(2)   | C13-C12-H12 | 120.5    |
| C24-N6-Th1  | 119.5(2)   | C11-C12-H12 | 120.5    |
| N1-C1-C2    | 113.7(3)   | C12-C13-C14 | 118.7(3) |
| N1-C1-C28   | 118.5(3)   | C12-C13-H13 | 120.7    |
| C2-C1-C28   | 127.8(3)   | C14-C13-H13 | 120.7    |
| C3-C2-C1    | 105.3(3)   | N3-C14-C13  | 123.2(3) |
| C3-C2-C29   | 128.6(3)   | N3-C14-C15  | 114.4(3) |
| C1-C2-C29   | 125.6(3)   | C13-C14-C15 | 122.4(3) |
| C2-C3-C4    | 106.1(3)   | N4-C15-C16  | 113.3(3) |
| C2-C3-C31   | 122.9(3)   | N4-C15-C14  | 118.8(3) |
| C4-C3-C31   | 130.4(3)   | C16-C15-C14 | 127.9(3) |
| C5-C4-N1    | 120.2(3)   | C17-C16-C15 | 105.8(3) |
| C5-C4-C3    | 129.7(3)   | C17-C16-C43 | 126.7(3) |
| N1-C4-C3    | 109.5(3)   | C15-C16-C43 | 127.3(3) |
| C4-C5-C6    | 124.4(3)   | C16-C17-C18 | 106.1(3) |
| C4-C5-C33   | 118.4(3)   | C16-C17-C45 | 123.1(3) |

|             |          |               |          |
|-------------|----------|---------------|----------|
| C18-C17-C45 | 130.2(3) | C30-C29-H29A  | 108.3    |
| C19-C18-N4  | 121.1(3) | C2-C29-H29B   | 108.3    |
| C19-C18-C17 | 129.4(3) | C30-C29-H29B  | 108.3    |
| N4-C18-C17  | 109.1(3) | H29A-C29-H29B | 107.4    |
| C18-C19-C20 | 124.0(3) | C29-C30-H30A  | 109.5    |
| C18-C19-C47 | 118.5(3) | C29-C30-H30B  | 109.5    |
| C20-C19-C47 | 117.5(3) | H30A-C30-H30B | 109.5    |
| N5-C20-C19  | 123.7(3) | C29-C30-H30C  | 109.5    |
| N5-C20-C21  | 110.0(3) | H30A-C30-H30C | 109.5    |
| C19-C20-C21 | 126.3(3) | H30B-C30-H30C | 109.5    |
| C22-C21-C20 | 106.7(3) | C3-C31-C32    | 112.0(3) |
| C22-C21-C53 | 122.9(3) | C3-C31-H31A   | 109.2    |
| C20-C21-C53 | 130.4(3) | C32-C31-H31A  | 109.2    |
| C21-C22-C23 | 106.1(3) | C3-C31-H31B   | 109.2    |
| C21-C22-C55 | 124.0(3) | C32-C31-H31B  | 109.2    |
| C23-C22-C55 | 129.8(3) | H31A-C31-H31B | 107.9    |
| N5-C23-C22  | 111.5(3) | C31-C32-H32A  | 109.5    |
| N5-C23-C24  | 118.6(3) | C31-C32-H32B  | 109.5    |
| C22-C23-C24 | 128.3(3) | H32A-C32-H32B | 109.5    |
| N6-C24-C25  | 120.8(3) | C31-C32-H32C  | 109.5    |
| N6-C24-C23  | 115.2(3) | H32A-C32-H32C | 109.5    |
| C25-C24-C23 | 123.7(3) | H32B-C32-H32C | 109.5    |
| C26-C25-C24 | 119.2(3) | C34-C33-C38   | 119.4(3) |
| C26-C25-H25 | 120.4    | C34-C33-C5    | 120.0(3) |
| C24-C25-H25 | 120.4    | C38-C33-C5    | 120.6(3) |
| C27-C26-C25 | 119.7(3) | C33-C34-C35   | 120.7(4) |
| C27-C26-H26 | 120.1    | C33-C34-H34   | 119.6    |
| C25-C26-H26 | 120.1    | C35-C34-H34   | 119.6    |
| C26-C27-C28 | 118.0(3) | C36-C35-C34   | 119.0(4) |
| C26-C27-H27 | 121.0    | C36-C35-H35   | 120.5    |
| C28-C27-H27 | 121.0    | C34-C35-H35   | 120.5    |
| N6-C28-C27  | 123.2(3) | C37-C36-C35   | 120.9(4) |
| N6-C28-C1   | 114.4(3) | C37-C36-H36   | 119.6    |
| C27-C28-C1  | 122.4(3) | C35-C36-H36   | 119.6    |
| C2-C29-C30  | 115.9(3) | C36-C37-C38   | 120.2(4) |
| C2-C29-H29A | 108.3    | C36-C37-H37   | 119.9    |

|               |          |               |          |
|---------------|----------|---------------|----------|
| C38-C37-H37   | 119.9    | H44A-C44-H44B | 109.5    |
| C37-C38-C33   | 119.7(4) | C43-C44-H44C  | 109.5    |
| C37-C38-H38   | 120.1    | H44A-C44-H44C | 109.5    |
| C33-C38-H38   | 120.1    | H44B-C44-H44C | 109.5    |
| C7-C39-C40    | 112.6(3) | C17-C45-C46   | 111.2(3) |
| C7-C39-H39A   | 109.1    | C17-C45-H45A  | 109.4    |
| C40-C39-H39A  | 109.1    | C46-C45-H45A  | 109.4    |
| C7-C39-H39B   | 109.1    | C17-C45-H45B  | 109.4    |
| C40-C39-H39B  | 109.1    | C46-C45-H45B  | 109.4    |
| H39A-C39-H39B | 107.8    | H45A-C45-H45B | 108.0    |
| C39-C40-H40A  | 109.5    | C45-C46-H46A  | 109.5    |
| C39-C40-H40B  | 109.5    | C45-C46-H46B  | 109.5    |
| H40A-C40-H40B | 109.5    | H46A-C46-H46B | 109.5    |
| C39-C40-H40C  | 109.5    | C45-C46-H46C  | 109.5    |
| H40A-C40-H40C | 109.5    | H46A-C46-H46C | 109.5    |
| H40B-C40-H40C | 109.5    | H46B-C46-H46C | 109.5    |
| C8-C41-C42    | 115.5(3) | C52-C47-C48   | 118.8(3) |
| C8-C41-H41A   | 108.4    | C52-C47-C19   | 119.1(3) |
| C42-C41-H41A  | 108.4    | C48-C47-C19   | 122.2(3) |
| C8-C41-H41B   | 108.4    | C49-C48-C47   | 120.5(3) |
| C42-C41-H41B  | 108.4    | C49-C48-H48   | 119.8    |
| H41A-C41-H41B | 107.5    | C47-C48-H48   | 119.8    |
| C41-C42-H42A  | 109.5    | C50-C49-C48   | 120.3(4) |
| C41-C42-H42B  | 109.5    | C50-C49-H49   | 119.8    |
| H42A-C42-H42B | 109.5    | C48-C49-H49   | 119.8    |
| C41-C42-H42C  | 109.5    | C49-C50-C51   | 120.0(3) |
| H42A-C42-H42C | 109.5    | C49-C50-H50   | 120.0    |
| H42B-C42-H42C | 109.5    | C51-C50-H50   | 120.0    |
| C16-C43-C44   | 114.5(3) | C50-C51-C52   | 120.1(3) |
| C16-C43-H43A  | 108.6    | C50-C51-H51   | 119.9    |
| C44-C43-H43A  | 108.6    | C52-C51-H51   | 119.9    |
| C16-C43-H43B  | 108.6    | C51-C52-C47   | 120.1(3) |
| C44-C43-H43B  | 108.6    | C51-C52-H52   | 119.9    |
| H43A-C43-H43B | 107.6    | C47-C52-H52   | 119.9    |
| C43-C44-H44A  | 109.5    | C21-C53-C54   | 113.4(3) |
| C43-C44-H44B  | 109.5    | C21-C53-H53A  | 108.9    |



|               |          |             |          |
|---------------|----------|-------------|----------|
| C54-C53-H53A  | 108.9    | C58-C57-H57 | 126.0    |
| C21-C53-H53B  | 108.9    | Th1-C57-H57 | 114.1    |
| C54-C53-H53B  | 108.9    | C57-C58-C59 | 108.4(3) |
| H53A-C53-H53B | 107.7    | C57-C58-Th1 | 75.0(2)  |
| C53-C54-H54A  | 109.5    | C59-C58-Th1 | 74.3(2)  |
| C53-C54-H54B  | 109.5    | C57-C58-H58 | 125.8    |
| H54A-C54-H54B | 109.5    | C59-C58-H58 | 125.8    |
| C53-C54-H54C  | 109.5    | Th1-C58-H58 | 116.9    |
| H54A-C54-H54C | 109.5    | C60-C59-C58 | 106.7(4) |
| H54B-C54-H54C | 109.5    | C60-C59-Th1 | 74.5(2)  |
| C22-C55-C56   | 113.2(3) | C58-C59-Th1 | 77.4(2)  |
| C22-C55-H55A  | 108.9    | C60-C59-H59 | 126.6    |
| C56-C55-H55A  | 108.9    | C58-C59-H59 | 126.6    |
| C22-C55-H55B  | 108.9    | Th1-C59-H59 | 114.0    |
| C56-C55-H55B  | 108.9    | C61-C60-C59 | 108.2(4) |
| H55A-C55-H55B | 107.7    | C61-C60-Th1 | 76.6(2)  |
| C55-C56-H56A  | 109.5    | C59-C60-Th1 | 76.8(2)  |
| C55-C56-H56B  | 109.5    | C61-C60-H60 | 125.9    |
| H56A-C56-H56B | 109.5    | C59-C60-H60 | 125.9    |
| C55-C56-H56C  | 109.5    | Th1-C60-H60 | 113.1    |
| H56A-C56-H56C | 109.5    | C57-C61-C60 | 108.6(4) |
| H56B-C56-H56C | 109.5    | C57-C61-Th1 | 76.9(2)  |
| C61-C57-C58   | 108.1(4) | C60-C61-Th1 | 75.1(2)  |
| C61-C57-Th1   | 75.1(2)  | C57-C61-H61 | 125.7    |
| C58-C57-Th1   | 77.1(2)  | C60-C61-H61 | 125.7    |
| C61-C57-H57   | 126.0    | Th1-C61-H61 | 114.5    |

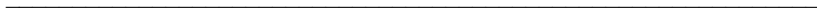

Anisotropic displacement parameters ( $\text{\AA}^2 \times 10^3$ ) for complex **2**. The anisotropic displacement factor exponent takes the form:  $-2\pi^2 [ h^2 a^{*2} U^{11} + \dots + 2 h k a^* b^* U^{12} ]$

|     | $U^{11}$ | $U^{22}$ | $U^{33}$ | $U^{23}$ | $U^{13}$ | $U^{12}$ |
|-----|----------|----------|----------|----------|----------|----------|
| Th1 | 15(1)    | 11(1)    | 14(1)    | 0(1)     | 1(1)     | 1(1)     |
| F1  | 41(1)    | 26(1)    | 43(1)    | 8(1)     | 16(1)    | 6(1)     |
| N1  | 16(1)    | 17(2)    | 16(1)    | -1(1)    | 0(1)     | 2(1)     |
| N2  | 12(1)    | 17(1)    | 15(1)    | -1(1)    | -2(1)    | 1(1)     |
| N3  | 15(1)    | 14(1)    | 16(1)    | -1(1)    | 2(1)     | -1(1)    |
| N4  | 18(1)    | 16(1)    | 17(1)    | 0(1)     | 0(1)     | 3(1)     |
| N5  | 18(1)    | 15(1)    | 18(1)    | -3(1)    | -1(1)    | 1(1)     |
| N6  | 19(1)    | 17(1)    | 17(1)    | 1(1)     | -1(1)    | 2(1)     |
| C1  | 22(2)    | 19(2)    | 15(1)    | -1(1)    | 1(1)     | 5(1)     |
| C2  | 20(2)    | 26(2)    | 19(2)    | 3(1)     | 4(1)     | 6(1)     |
| C3  | 15(1)    | 28(2)    | 20(2)    | 5(1)     | 3(1)     | 5(1)     |
| C4  | 14(1)    | 19(2)    | 19(1)    | 1(1)     | 2(1)     | 3(1)     |
| C5  | 15(1)    | 18(2)    | 14(1)    | -1(1)    | 0(1)     | 3(1)     |
| C6  | 17(1)    | 14(1)    | 13(1)    | 0(1)     | 2(1)     | 1(1)     |
| C7  | 19(1)    | 14(1)    | 15(1)    | 1(1)     | 0(1)     | 0(1)     |
| C8  | 18(1)    | 17(1)    | 18(1)    | 2(1)     | -1(1)    | 3(1)     |
| C9  | 15(2)    | 17(2)    | 16(2)    | -1(1)    | 1(1)     | 1(1)     |
| C10 | 14(1)    | 15(1)    | 19(2)    | 1(1)     | 1(1)     | -1(1)    |
| C11 | 15(1)    | 21(2)    | 25(2)    | 4(1)     | -2(1)    | 2(1)     |
| C12 | 14(1)    | 20(2)    | 30(2)    | 2(1)     | 3(1)     | 5(1)     |
| C13 | 19(2)    | 22(2)    | 25(2)    | 1(1)     | 7(1)     | 2(1)     |
| C14 | 18(1)    | 12(1)    | 19(1)    | 1(1)     | 1(1)     | -1(1)    |
| C15 | 15(1)    | 15(1)    | 19(2)    | 1(1)     | 2(1)     | 0(1)     |
| C16 | 17(1)    | 18(2)    | 18(1)    | 0(1)     | 4(1)     | -2(1)    |
| C17 | 19(1)    | 21(2)    | 14(1)    | 0(1)     | 5(1)     | -1(1)    |
| C18 | 18(1)    | 20(2)    | 14(1)    | 2(1)     | 3(1)     | -1(1)    |
| C19 | 14(1)    | 22(2)    | 21(2)    | 2(1)     | 1(1)     | 1(1)     |
| C20 | 16(1)    | 17(2)    | 21(2)    | 5(1)     | 0(1)     | 2(1)     |
| C21 | 16(1)    | 21(2)    | 26(2)    | 4(1)     | -2(1)    | 1(1)     |
| C22 | 17(1)    | 16(2)    | 29(2)    | 1(1)     | -3(1)    | -1(1)    |
| C23 | 18(1)    | 15(2)    | 22(2)    | 0(1)     | -1(1)    | 0(1)     |

|     |       |       |       |        |        |       |
|-----|-------|-------|-------|--------|--------|-------|
| C24 | 19(1) | 15(2) | 23(2) | -1(1)  | -1(1)  | 1(1)  |
| C25 | 33(2) | 15(2) | 30(2) | -7(1)  | -1(2)  | -1(1) |
| C26 | 43(2) | 20(2) | 27(2) | -11(1) | -1(2)  | 8(2)  |
| C27 | 30(2) | 24(2) | 22(2) | -6(1)  | 5(1)   | 7(1)  |
| C28 | 24(2) | 18(2) | 16(1) | -2(1)  | -1(1)  | 5(1)  |
| C29 | 25(2) | 29(2) | 32(2) | 8(2)   | 4(1)   | 11(2) |
| C30 | 38(2) | 41(2) | 42(2) | 9(2)   | 12(2)  | 21(2) |
| C31 | 14(2) | 33(2) | 37(2) | 12(2)  | 4(1)   | 4(1)  |
| C32 | 20(2) | 35(2) | 54(3) | 0(2)   | -5(2)  | -5(2) |
| C33 | 15(1) | 22(2) | 23(2) | 5(1)   | 1(1)   | 3(1)  |
| C34 | 20(2) | 26(2) | 27(2) | 5(1)   | -3(1)  | -2(1) |
| C35 | 29(2) | 29(2) | 45(2) | 14(2)  | -10(2) | -9(2) |
| C36 | 21(2) | 46(2) | 50(2) | 26(2)  | 1(2)   | -6(2) |
| C37 | 23(2) | 46(2) | 36(2) | 19(2)  | 12(2)  | 9(2)  |
| C38 | 20(2) | 30(2) | 26(2) | 7(1)   | 5(1)   | 6(1)  |
| C39 | 20(1) | 18(2) | 18(2) | 5(1)   | 2(1)   | 2(1)  |
| C40 | 28(2) | 29(2) | 19(2) | 2(1)   | 1(1)   | -2(1) |
| C41 | 18(2) | 29(2) | 23(2) | 9(1)   | -1(1)  | 4(1)  |
| C42 | 29(2) | 29(2) | 43(2) | 8(2)   | 1(2)   | 8(1)  |
| C43 | 29(2) | 17(2) | 23(2) | -2(1)  | 6(1)   | 0(1)  |
| C44 | 36(2) | 24(2) | 31(2) | -3(2)  | 14(2)  | 6(2)  |
| C45 | 28(2) | 26(2) | 18(2) | -1(1)  | 2(1)   | 2(1)  |
| C46 | 31(2) | 34(2) | 24(2) | -7(2)  | -5(1)  | 2(2)  |
| C47 | 22(2) | 19(2) | 18(2) | 3(1)   | 2(1)   | 2(1)  |
| C48 | 21(2) | 32(2) | 25(2) | 7(1)   | 2(1)   | 2(1)  |
| C49 | 30(2) | 32(2) | 25(2) | 5(1)   | 9(2)   | 2(1)  |
| C50 | 42(2) | 26(2) | 15(2) | 6(1)   | 1(2)   | 3(1)  |
| C51 | 25(2) | 27(2) | 23(2) | 7(1)   | -4(1)  | 1(1)  |
| C52 | 20(2) | 21(2) | 21(2) | 1(1)   | 3(1)   | 2(1)  |
| C53 | 31(2) | 18(2) | 33(2) | 8(1)   | 4(2)   | 0(1)  |
| C54 | 38(2) | 30(2) | 57(3) | 15(2)  | 15(2)  | -5(2) |
| C55 | 30(2) | 15(2) | 35(2) | 0(1)   | -3(2)  | -6(1) |
| C56 | 42(2) | 18(2) | 51(2) | -2(2)  | -9(2)  | 3(2)  |
| C57 | 28(2) | 24(2) | 45(2) | 3(2)   | -17(2) | 1(2)  |
| C58 | 18(2) | 42(2) | 21(2) | -6(2)  | 1(1)   | -8(2) |
| C59 | 34(2) | 22(2) | 41(2) | -1(2)  | -16(2) | -7(2) |

|     |       |       |       |        |       |        |
|-----|-------|-------|-------|--------|-------|--------|
| C60 | 18(2) | 55(3) | 37(2) | -28(2) | -2(1) | 0(2)   |
| C61 | 33(2) | 61(3) | 25(2) | 12(2)  | -5(2) | -20(2) |

---

Hydrogen coordinates ( $\times 10^4$ ) and isotropic displacement parameters ( $\text{\AA}^2 \times 10^3$ ) for complex **2**.

|      | x     | y     | z     | U(eq) |
|------|-------|-------|-------|-------|
| H11  | 9784  | 2906  | 8366  | 24    |
| H12  | 10606 | 2851  | 7612  | 25    |
| H13  | 10185 | 3788  | 6825  | 26    |
| H25  | 7689  | 10801 | 8162  | 31    |
| H26  | 6769  | 10805 | 8865  | 36    |
| H27  | 5948  | 9224  | 8995  | 31    |
| H29A | 4156  | 7558  | 8372  | 34    |
| H29B | 4823  | 8525  | 8357  | 34    |
| H30A | 3890  | 8942  | 9027  | 60    |
| H30B | 4747  | 8718  | 9308  | 60    |
| H30C | 4069  | 7761  | 9318  | 60    |
| H31A | 3971  | 5851  | 8849  | 34    |
| H31B | 4412  | 4719  | 9046  | 34    |
| H32A | 4110  | 5262  | 7939  | 55    |
| H32B | 3601  | 4362  | 8272  | 55    |
| H32C | 4525  | 4119  | 8144  | 55    |
| H34  | 5693  | 2362  | 8481  | 29    |
| H35  | 4840  | 1080  | 8909  | 41    |
| H36  | 4365  | 1501  | 9765  | 47    |
| H37  | 4719  | 3177  | 10189 | 42    |
| H38  | 5566  | 4462  | 9765  | 30    |
| H39A | 7566  | 1830  | 9614  | 23    |
| H39B | 6678  | 2337  | 9549  | 23    |
| H40A | 7045  | 3915  | 10075 | 38    |
| H40B | 7951  | 3466  | 10121 | 38    |
| H40C | 7243  | 2789  | 10408 | 38    |
| H41A | 8862  | 2506  | 9573  | 28    |
| H41B | 9472  | 2947  | 9130  | 28    |
| H42A | 9199  | 1303  | 8608  | 50    |
| H42B | 8627  | 855   | 9074  | 50    |
| H42C | 9571  | 992   | 9188  | 50    |

|      |       |       |      |    |
|------|-------|-------|------|----|
| H43A | 8645  | 3397  | 5665 | 28 |
| H43B | 9111  | 3091  | 6213 | 28 |
| H44A | 9867  | 4185  | 5327 | 45 |
| H44B | 9953  | 2866  | 5454 | 45 |
| H44C | 10322 | 3776  | 5865 | 45 |
| H45A | 8570  | 4992  | 5099 | 29 |
| H45B | 8398  | 6322  | 5096 | 29 |
| H46A | 7212  | 5348  | 4844 | 44 |
| H46B | 7070  | 5975  | 5405 | 44 |
| H46C | 7244  | 4647  | 5394 | 44 |
| H48  | 9294  | 8083  | 5405 | 31 |
| H49  | 9097  | 8774  | 4533 | 34 |
| H50  | 7811  | 9124  | 4206 | 33 |
| H51  | 6705  | 8845  | 4758 | 30 |
| H52  | 6898  | 8304  | 5657 | 25 |
| H53A | 8338  | 11163 | 6179 | 33 |
| H53B | 8324  | 10088 | 5790 | 33 |
| H54A | 9609  | 10936 | 5788 | 62 |
| H54B | 9680  | 9689  | 6031 | 62 |
| H54C | 9694  | 10756 | 6425 | 62 |
| H55A | 8734  | 11605 | 7040 | 32 |
| H55B | 8481  | 11313 | 7642 | 32 |
| H56A | 7356  | 11993 | 6819 | 56 |
| H56B | 7680  | 12808 | 7288 | 56 |
| H56C | 7125  | 11750 | 7431 | 56 |
| H57  | 5879  | 7221  | 7118 | 39 |
| H58  | 5589  | 5570  | 7711 | 33 |
| H59  | 6459  | 3939  | 7419 | 39 |
| H60  | 7236  | 4600  | 6610 | 44 |
| H61  | 6857  | 6605  | 6425 | 48 |

---

Torsion angles [°] for complex 2.

|               |           |
|---------------|-----------|
| C4-N1-C1-C2   | -5.3(4)   |
| Th1-N1-C1-C2  | 136.9(2)  |
| C4-N1-C1-C28  | 174.9(3)  |
| Th1-N1-C1-C28 | -42.9(3)  |
| N1-C1-C2-C3   | 2.6(4)    |
| C28-C1-C2-C3  | -177.6(3) |
| N1-C1-C2-C29  | -170.2(3) |
| C28-C1-C2-C29 | 9.6(6)    |
| C1-C2-C3-C4   | 1.3(4)    |
| C29-C2-C3-C4  | 173.7(3)  |
| C1-C2-C3-C31  | -171.1(3) |
| C29-C2-C3-C31 | 1.3(6)    |
| C1-N1-C4-C5   | -166.7(3) |
| Th1-N1-C4-C5  | 59.7(4)   |
| C1-N1-C4-C3   | 5.9(4)    |
| Th1-N1-C4-C3  | -127.8(3) |
| C2-C3-C4-C5   | 167.1(3)  |
| C31-C3-C4-C5  | -21.3(6)  |
| C2-C3-C4-N1   | -4.5(4)   |
| C31-C3-C4-N1  | 167.1(3)  |
| N1-C4-C5-C6   | -9.5(5)   |
| C3-C4-C5-C6   | 179.6(3)  |
| N1-C4-C5-C33  | 166.6(3)  |
| C3-C4-C5-C33  | -4.3(5)   |
| C9-N2-C6-C5   | 177.5(3)  |
| Th1-N2-C6-C5  | 12.1(5)   |
| C9-N2-C6-C7   | 1.6(3)    |
| Th1-N2-C6-C7  | -163.8(2) |
| C4-C5-C6-N2   | -26.0(5)  |
| C33-C5-C6-N2  | 157.9(3)  |
| C4-C5-C6-C7   | 149.3(3)  |
| C33-C5-C6-C7  | -26.8(5)  |
| N2-C6-C7-C8   | 1.4(4)    |
| C5-C6-C7-C8   | -174.4(3) |
| N2-C6-C7-C39  | 173.1(3)  |



|                 |           |
|-----------------|-----------|
| C5-C6-C7-C39    | -2.7(6)   |
| C6-C7-C8-C9     | -3.7(3)   |
| C39-C7-C8-C9    | -176.3(3) |
| C6-C7-C8-C41    | 172.2(3)  |
| C39-C7-C8-C41   | -0.4(5)   |
| C6-N2-C9-C8     | -4.1(4)   |
| Th1-N2-C9-C8    | 164.7(2)  |
| C6-N2-C9-C10    | 165.5(3)  |
| Th1-N2-C9-C10   | -25.7(4)  |
| C7-C8-C9-N2     | 5.0(4)    |
| C41-C8-C9-N2    | -170.6(3) |
| C7-C8-C9-C10    | -163.4(3) |
| C41-C8-C9-C10   | 21.0(6)   |
| C14-N3-C10-C11  | 5.2(4)    |
| Th1-N3-C10-C11  | -161.2(2) |
| C14-N3-C10-C9   | -167.9(3) |
| Th1-N3-C10-C9   | 25.6(4)   |
| N2-C9-C10-N3    | 0.7(4)    |
| C8-C9-C10-N3    | 168.4(3)  |
| N2-C9-C10-C11   | -172.3(3) |
| C8-C9-C10-C11   | -4.5(5)   |
| N3-C10-C11-C12  | -3.4(5)   |
| C9-C10-C11-C12  | 169.1(3)  |
| C10-C11-C12-C13 | -0.9(5)   |
| C11-C12-C13-C14 | 3.2(5)    |
| C10-N3-C14-C13  | -2.9(5)   |
| Th1-N3-C14-C13  | 163.5(2)  |
| C10-N3-C14-C15  | 177.1(3)  |
| Th1-N3-C14-C15  | -16.6(3)  |
| C12-C13-C14-N3  | -1.4(5)   |
| C12-C13-C14-C15 | 178.6(3)  |
| C18-N4-C15-C16  | -3.5(4)   |
| Th1-N4-C15-C16  | 136.3(2)  |
| C18-N4-C15-C14  | 177.8(3)  |
| Th1-N4-C15-C14  | -42.4(3)  |
| N3-C14-C15-N4   | 41.2(4)   |

|                 |           |
|-----------------|-----------|
| C13-C14-C15-N4  | -138.8(3) |
| N3-C14-C15-C16  | -137.2(3) |
| C13-C14-C15-C16 | 42.8(5)   |
| N4-C15-C16-C17  | 0.6(4)    |
| C14-C15-C16-C17 | 179.1(3)  |
| N4-C15-C16-C43  | -174.3(3) |
| C14-C15-C16-C43 | 4.2(5)    |
| C15-C16-C17-C18 | 2.5(3)    |
| C43-C16-C17-C18 | 177.4(3)  |
| C15-C16-C17-C45 | -169.6(3) |
| C43-C16-C17-C45 | 5.3(5)    |
| C15-N4-C18-C19  | -168.0(3) |
| Th1-N4-C18-C19  | 59.4(4)   |
| C15-N4-C18-C17  | 5.0(4)    |
| Th1-N4-C18-C17  | -127.6(2) |
| C16-C17-C18-C19 | 167.5(3)  |
| C45-C17-C18-C19 | -21.2(6)  |
| C16-C17-C18-N4  | -4.8(4)   |
| C45-C17-C18-N4  | 166.6(3)  |
| N4-C18-C19-C20  | -7.7(5)   |
| C17-C18-C19-C20 | -179.1(3) |
| N4-C18-C19-C47  | 172.4(3)  |
| C17-C18-C19-C47 | 1.0(5)    |
| C23-N5-C20-C19  | 177.7(3)  |
| Th1-N5-C20-C19  | 5.3(5)    |
| C23-N5-C20-C21  | 0.9(3)    |
| Th1-N5-C20-C21  | -171.6(2) |
| C18-C19-C20-N5  | -25.8(5)  |
| C47-C19-C20-N5  | 154.1(3)  |
| C18-C19-C20-C21 | 150.5(3)  |
| C47-C19-C20-C21 | -29.6(5)  |
| N5-C20-C21-C22  | 2.2(4)    |
| C19-C20-C21-C22 | -174.5(3) |
| N5-C20-C21-C53  | 178.8(3)  |
| C19-C20-C21-C53 | 2.1(6)    |
| C20-C21-C22-C23 | -4.2(4)   |

|                 |           |
|-----------------|-----------|
| C53-C21-C22-C23 | 178.8(3)  |
| C20-C21-C22-C55 | 177.4(3)  |
| C53-C21-C22-C55 | 0.5(5)    |
| C20-N5-C23-C22  | -3.7(4)   |
| Th1-N5-C23-C22  | 170.6(2)  |
| C20-N5-C23-C24  | 162.8(3)  |
| Th1-N5-C23-C24  | -22.9(4)  |
| C21-C22-C23-N5  | 5.1(4)    |
| C55-C22-C23-N5  | -176.7(3) |
| C21-C22-C23-C24 | -159.8(3) |
| C55-C22-C23-C24 | 18.4(6)   |
| C28-N6-C24-C25  | 7.6(5)    |
| Th1-N6-C24-C25  | -158.0(3) |
| C28-N6-C24-C23  | -165.8(3) |
| Th1-N6-C24-C23  | 28.5(4)   |
| N5-C23-C24-N6   | -2.9(5)   |
| C22-C23-C24-N6  | 161.0(3)  |
| N5-C23-C24-C25  | -176.2(3) |
| C22-C23-C24-C25 | -12.2(6)  |
| N6-C24-C25-C26  | -5.7(5)   |
| C23-C24-C25-C26 | 167.2(3)  |
| C24-C25-C26-C27 | -1.0(6)   |
| C25-C26-C27-C28 | 5.4(6)    |
| C24-N6-C28-C27  | -3.0(5)   |
| Th1-N6-C28-C27  | 162.5(3)  |
| C24-N6-C28-C1   | 178.6(3)  |
| Th1-N6-C28-C1   | -15.8(4)  |
| C26-C27-C28-N6  | -3.5(5)   |
| C26-C27-C28-C1  | 174.7(3)  |
| N1-C1-C28-N6    | 41.3(4)   |
| C2-C1-C28-N6    | -138.5(3) |
| N1-C1-C28-C27   | -137.1(3) |
| C2-C1-C28-C27   | 43.1(5)   |
| C3-C2-C29-C30   | 84.1(5)   |
| C1-C2-C29-C30   | -104.9(4) |
| C2-C3-C31-C32   | 100.2(4)  |

|                 |           |
|-----------------|-----------|
| C4-C3-C31-C32   | -70.2(5)  |
| C4-C5-C33-C34   | 116.2(4)  |
| C6-C5-C33-C34   | -67.4(4)  |
| C4-C5-C33-C38   | -64.8(4)  |
| C6-C5-C33-C38   | 111.6(4)  |
| C38-C33-C34-C35 | -0.5(5)   |
| C5-C33-C34-C35  | 178.5(3)  |
| C33-C34-C35-C36 | 0.0(5)    |
| C34-C35-C36-C37 | 0.4(6)    |
| C35-C36-C37-C38 | -0.3(6)   |
| C36-C37-C38-C33 | -0.2(6)   |
| C34-C33-C38-C37 | 0.6(5)    |
| C5-C33-C38-C37  | -178.4(3) |
| C8-C7-C39-C40   | 86.3(4)   |
| C6-C7-C39-C40   | -84.3(4)  |
| C7-C8-C41-C42   | 91.2(4)   |
| C9-C8-C41-C42   | -93.9(4)  |
| C17-C16-C43-C44 | 79.4(5)   |
| C15-C16-C43-C44 | -106.8(4) |
| C16-C17-C45-C46 | 96.8(4)   |
| C18-C17-C45-C46 | -73.3(5)  |
| C18-C19-C47-C52 | 107.2(4)  |
| C20-C19-C47-C52 | -72.7(4)  |
| C18-C19-C47-C48 | -72.3(4)  |
| C20-C19-C47-C48 | 107.8(4)  |
| C52-C47-C48-C49 | 0.4(6)    |
| C19-C47-C48-C49 | 179.9(3)  |
| C47-C48-C49-C50 | -2.3(6)   |
| C48-C49-C50-C51 | 1.3(6)    |
| C49-C50-C51-C52 | 1.7(6)    |
| C50-C51-C52-C47 | -3.6(5)   |
| C48-C47-C52-C51 | 2.5(5)    |
| C19-C47-C52-C51 | -177.0(3) |
| C22-C21-C53-C54 | 88.4(4)   |
| C20-C21-C53-C54 | -87.8(5)  |
| C21-C22-C55-C56 | 90.1(5)   |

|                 |          |         |
|-----------------|----------|---------|
| C23-C22-C55-C56 | -87.9(5) |         |
| C61-C57-C58-C59 | 2.0(4)   |         |
| Th1-C57-C58-C59 | -67.4(3) |         |
| C61-C57-C58-Th1 | 69.3(3)  |         |
| C57-C58-C59-C60 | -1.5(4)  |         |
| Th1-C58-C59-C60 | -69.3(3) |         |
| C57-C58-C59-Th1 | 67.8(3)  |         |
| C58-C59-C60-C61 | 0.5(4)   |         |
| Th1-C59-C60-C61 | -70.9(3) |         |
| C58-C59-C60-Th1 | 71.3(3)  |         |
| C58-C57-C61-C60 | -1.7(5)  |         |
| Th1-C57-C61-C60 | 69.1(3)  |         |
| C58-C57-C61-Th1 | -70.8(3) |         |
| C59-C60-C61-C57 | 0.7(5)   |         |
| Th1-C60-C61-C57 | -70.3(3) |         |
| C59-C60-C61-Th1 |          | 71.0(3) |

Crystal data and structure refinement for complex 4.

|                                   |                                             |                               |
|-----------------------------------|---------------------------------------------|-------------------------------|
| Identification code               | shelx                                       |                               |
| Empirical formula                 | C70 H66 N6 O4 Th                            |                               |
| Formula weight                    | 1287.32                                     |                               |
| Temperature                       | 100(2) K                                    |                               |
| Wavelength                        | 1.54184 Å                                   |                               |
| Crystal system                    | triclinic                                   |                               |
| Space group                       | P -1                                        |                               |
| Unit cell dimensions              | a = 14.3363(14) Å                           | $\alpha = 92.393(6)^\circ$ .  |
|                                   | b = 14.7285(10) Å                           | $\beta = 90.934(7)^\circ$ .   |
|                                   | c = 17.9046(13) Å                           | $\gamma = 117.483(9)^\circ$ . |
| Volume                            | 3348.3(5) Å <sup>3</sup>                    |                               |
| Z                                 | 2                                           |                               |
| Density (calculated)              | 1.277 Mg/m <sup>3</sup>                     |                               |
| Absorption coefficient            | 7.561 mm <sup>-1</sup>                      |                               |
| F(000)                            | 1300                                        |                               |
| Crystal size                      | 0.200 x 0.039 x 0.031 mm <sup>3</sup>       |                               |
| Theta range for data collection   | 3.388 to 68.408°.                           |                               |
| Index ranges                      | -17<=h<=11, -15<=k<=17, -20<=l<=21          |                               |
| Reflections collected             | 18270                                       |                               |
| Independent reflections           | 11816 [R(int) = 0.1482]                     |                               |
| Completeness to theta = 67.684°   | 96.5 %                                      |                               |
| Absorption correction             | Gaussian and multi-scan                     |                               |
| Max. and min. transmission        | 1.00 and 0.441                              |                               |
| Refinement method                 | Full-matrix least-squares on F <sup>2</sup> |                               |
| Data / restraints / parameters    | 11816 / 1323 / 738                          |                               |
| Goodness-of-fit on F <sup>2</sup> | 1.057                                       |                               |
| Final R indices [I>2sigma(I)]     | R1 = 0.1053, wR2 = 0.2406                   |                               |
| R indices (all data)              | R1 = 0.1438, wR2 = 0.2783                   |                               |
| Extinction coefficient            | n/a                                         |                               |
| Largest diff. peak and hole       | 4.637 and -3.328 e.Å <sup>-3</sup>          |                               |

Atomic coordinates ( $\times 10^4$ ) and equivalent isotropic displacement parameters ( $\text{\AA}^2 \times 10^3$ )  
for complex **4**.  $U(\text{eq})$  is defined as one third of the trace of the orthogonalized  $U^{ij}$  tensor.

|     | x        | y        | z        | $U(\text{eq})$ |
|-----|----------|----------|----------|----------------|
| Th1 | 4276(1)  | 5384(1)  | 2492(1)  | 39(1)          |
| O1  | 3615(10) | 6620(9)  | 2114(8)  | 52(3)          |
| O2  | 2649(8)  | 5461(9)  | 2868(7)  | 44(2)          |
| O3  | 5174(9)  | 4423(8)  | 1965(6)  | 40(2)          |
| O4  | 5757(9)  | 5189(8)  | 3067(6)  | 42(2)          |
| N1  | 2913(11) | 3435(10) | 2619(7)  | 41(3)          |
| N2  | 3142(10) | 4478(9)  | 1291(7)  | 38(2)          |
| N3  | 5021(10) | 6076(9)  | 1168(7)  | 35(2)          |
| N4  | 5963(11) | 7122(10) | 2366(8)  | 45(3)          |
| N5  | 4860(11) | 6595(10) | 3725(8)  | 44(3)          |
| N6  | 3779(10) | 4571(9)  | 3808(7)  | 34(2)          |
| C1  | 3143(12) | 2972(10) | 3154(8)  | 36(3)          |
| C2  | 2779(12) | 1883(11) | 2989(9)  | 38(3)          |
| C3  | 2200(13) | 1703(11) | 2317(9)  | 41(3)          |
| C4  | 2289(12) | 2678(11) | 2099(8)  | 35(3)          |
| C5  | 1709(12) | 2861(12) | 1544(9)  | 39(3)          |
| C6  | 2035(13) | 3780(13) | 1203(9)  | 44(3)          |
| C7  | 1511(14) | 4127(14) | 663(10)  | 51(3)          |
| C8  | 2319(14) | 4924(13) | 317(10)  | 48(3)          |
| C9  | 3273(12) | 5088(11) | 702(8)   | 35(2)          |
| C10 | 4364(13) | 5783(12) | 556(9)   | 42(3)          |
| C11 | 4739(13) | 6047(12) | -160(9)  | 42(3)          |
| C12 | 5806(14) | 6613(13) | -238(10) | 46(3)          |
| C13 | 6489(14) | 6918(14) | 392(10)  | 49(3)          |
| C14 | 6055(13) | 6655(12) | 1105(10) | 41(3)          |
| C15 | 6611(13) | 7152(12) | 1802(9)  | 43(3)          |
| C16 | 7687(13) | 7840(12) | 1979(9)  | 44(3)          |
| C17 | 7677(14) | 8350(12) | 2664(10) | 46(3)          |
| C18 | 6600(14) | 7915(13) | 2857(10) | 47(3)          |
| C19 | 6153(13) | 8258(12) | 3446(10) | 45(3)          |
| C20 | 5252(13) | 7701(12) | 3806(9)  | 42(3)          |

|     |           |           |          |        |
|-----|-----------|-----------|----------|--------|
| C21 | 4680(13)  | 7924(12)  | 4337(10) | 45(3)  |
| C22 | 4077(13)  | 7021(12)  | 4690(9)  | 41(3)  |
| C23 | 4245(13)  | 6245(12)  | 4307(8)  | 39(3)  |
| C24 | 3873(11)  | 5163(11)  | 4431(8)  | 35(3)  |
| C25 | 3716(12)  | 4784(12)  | 5158(9)  | 38(3)  |
| C26 | 3522(12)  | 3788(12)  | 5207(9)  | 41(3)  |
| C27 | 3392(13)  | 3165(12)  | 4594(9)  | 43(3)  |
| C28 | 3504(12)  | 3589(11)  | 3886(9)  | 37(3)  |
| C29 | 2890(15)  | 1133(13)  | 3432(11) | 53(4)  |
| C30 | 1857(18)  | 462(18)   | 3845(13) | 74(6)  |
| C31 | 1755(14)  | 683(13)   | 1874(10) | 50(4)  |
| C32 | 2580(16)  | 721(15)   | 1291(12) | 61(5)  |
| C33 | 665(13)   | 1979(13)  | 1262(10) | 45(3)  |
| C34 | -126(14)  | 1476(14)  | 1757(11) | 50(3)  |
| C35 | -1077(16) | 681(16)   | 1486(12) | 60(4)  |
| C36 | -1245(17) | 372(17)   | 719(13)  | 66(4)  |
| C37 | -453(15)  | 853(16)   | 231(12)  | 62(4)  |
| C38 | 513(15)   | 1651(15)  | 504(11)  | 55(4)  |
| C39 | 363(15)   | 3801(18)  | 614(13)  | 66(4)  |
| C40 | 60(20)    | 4220(30)  | 1251(17) | 100(8) |
| C41 | 2185(15)  | 5560(14)  | -263(11) | 55(4)  |
| C42 | 2484(18)  | 6651(15)  | 36(13)   | 66(5)  |
| C43 | 8625(15)  | 7964(15)  | 1537(12) | 58(4)  |
| C44 | 8706(17)  | 6959(16)  | 1405(12) | 61(5)  |
| C45 | 8654(14)  | 9106(14)  | 3123(10) | 49(4)  |
| C46 | 8860(17)  | 8653(16)  | 3813(12) | 63(5)  |
| C47 | 6738(14)  | 9406(13)  | 3649(12) | 53(3)  |
| C48 | 6895(16)  | 10084(16) | 3072(14) | 66(4)  |
| C49 | 7441(19)  | 11147(18) | 3216(16) | 77(5)  |
| C50 | 7830(20)  | 11500(20) | 3933(16) | 80(5)  |
| C51 | 7703(17)  | 10888(18) | 4480(14) | 71(5)  |
| C52 | 7141(16)  | 9788(17)  | 4340(13) | 67(4)  |
| C53 | 4632(15)  | 8922(13)  | 4497(10) | 49(4)  |
| C54 | 4075(17)  | 9128(16)  | 3842(13) | 64(5)  |
| C55 | 3359(14)  | 6876(13)  | 5328(10) | 48(3)  |
| C56 | 4043(18)  | 7396(15)  | 6056(12) | 66(5)  |



|     |          |          |          |        |
|-----|----------|----------|----------|--------|
| C57 | 2832(15) | 6250(14) | 2552(11) | 51(3)  |
| C58 | 2135(14) | 6746(14) | 2620(11) | 50(3)  |
| C59 | 1497(18) | 6524(19) | 3179(16) | 77(5)  |
| C60 | 850(20)  | 7010(20) | 3268(17) | 83(5)  |
| C61 | 980(20)  | 7800(20) | 2778(18) | 89(6)  |
| C62 | 1650(19) | 8011(19) | 2281(16) | 77(5)  |
| C63 | 2262(18) | 7509(17) | 2140(14) | 67(4)  |
| C64 | 5836(14) | 4682(14) | 2521(10) | 46(3)  |
| C65 | 6689(14) | 4342(14) | 2522(11) | 52(3)  |
| C66 | 7555(16) | 4859(18) | 3015(14) | 68(4)  |
| C67 | 8410(20) | 4610(20) | 3066(18) | 95(6)  |
| C68 | 8170(20) | 3760(30) | 2610(19) | 100(7) |
| C69 | 7470(20) | 3300(20) | 2086(17) | 87(6)  |
| C70 | 6590(20) | 3532(19) | 2068(14) | 75(5)  |

---

## Bond lengths [Å] and angles [°] for complex 4.

---

|        |           |         |         |
|--------|-----------|---------|---------|
| Th1-O4 | 2.483(10) | C5-C33  | 1.52(2) |
| Th1-O3 | 2.482(10) | C6-C7   | 1.46(2) |
| Th1-O2 | 2.489(11) | C7-C8   | 1.39(3) |
| Th1-O1 | 2.519(12) | C7-C39  | 1.49(3) |
| Th1-N2 | 2.587(12) | C8-C9   | 1.43(2) |
| Th1-N4 | 2.609(14) | C8-C41  | 1.49(2) |
| Th1-N6 | 2.645(12) | C9-C10  | 1.46(2) |
| Th1-N5 | 2.644(13) | C10-C11 | 1.40(2) |
| Th1-N1 | 2.646(13) | C11-C12 | 1.38(2) |
| Th1-N3 | 2.660(13) | C11-H11 | 0.95    |
| O1-C57 | 1.29(2)   | C12-C13 | 1.40(2) |
| O2-C57 | 1.23(2)   | C12-H12 | 0.95    |
| O3-C64 | 1.28(2)   | C13-C14 | 1.42(2) |
| O4-C64 | 1.24(2)   | C13-H13 | 0.95    |
| N1-C1  | 1.320(19) | C14-C15 | 1.44(2) |
| N1-C4  | 1.370(19) | C15-C16 | 1.42(2) |
| N2-C9  | 1.37(2)   | C16-C17 | 1.41(2) |
| N2-C6  | 1.44(2)   | C16-C43 | 1.51(3) |
| N3-C14 | 1.34(2)   | C17-C18 | 1.43(3) |
| N3-C10 | 1.35(2)   | C17-C45 | 1.52(2) |
| N4-C18 | 1.37(2)   | C18-C19 | 1.43(2) |
| N4-C15 | 1.37(2)   | C19-C20 | 1.36(3) |
| N5-C23 | 1.34(2)   | C19-C47 | 1.52(2) |
| N5-C20 | 1.46(2)   | C20-C21 | 1.39(2) |
| N6-C28 | 1.33(2)   | C21-C22 | 1.39(2) |
| N6-C24 | 1.352(19) | C21-C53 | 1.52(2) |
| C1-C2  | 1.46(2)   | C22-C23 | 1.42(2) |
| C1-C28 | 1.50(2)   | C22-C55 | 1.51(2) |
| C2-C3  | 1.40(2)   | C23-C24 | 1.46(2) |
| C2-C29 | 1.45(2)   | C24-C25 | 1.42(2) |
| C3-C4  | 1.45(2)   | C25-C26 | 1.37(2) |
| C3-C31 | 1.51(2)   | C25-H25 | 0.95    |
| C4-C5  | 1.40(2)   | C26-C27 | 1.35(2) |
| C5-C6  | 1.38(2)   | C26-H26 | 0.95    |

|          |         |          |         |
|----------|---------|----------|---------|
| C27-C28  | 1.42(2) | C42-H42C | 0.98    |
| C27-H27  | 0.95    | C43-C44  | 1.55(3) |
| C29-C30  | 1.57(3) | C43-H43A | 0.99    |
| C29-H29A | 0.99    | C43-H43B | 0.99    |
| C29-H29B | 0.99    | C44-H44A | 0.98    |
| C30-H30A | 0.98    | C44-H44B | 0.98    |
| C30-H30B | 0.98    | C44-H44C | 0.98    |
| C30-H30C | 0.98    | C45-C46  | 1.52(3) |
| C31-C32  | 1.57(3) | C45-H45A | 0.99    |
| C31-H31A | 0.99    | C45-H45B | 0.99    |
| C31-H31B | 0.99    | C46-H46A | 0.98    |
| C32-H32A | 0.98    | C46-H46B | 0.98    |
| C32-H32B | 0.98    | C46-H46C | 0.98    |
| C32-H32C | 0.98    | C47-C52  | 1.34(3) |
| C33-C34  | 1.39(3) | C47-C48  | 1.42(3) |
| C33-C38  | 1.40(3) | C48-C49  | 1.40(3) |
| C34-C35  | 1.39(3) | C48-H48  | 0.95    |
| C34-H34  | 0.95    | C49-C50  | 1.37(4) |
| C35-C36  | 1.41(3) | C49-H49  | 0.95    |
| C35-H35  | 0.95    | C50-C51  | 1.32(4) |
| C36-C37  | 1.38(3) | C50-H50  | 0.95    |
| C36-H36  | 0.95    | C51-C52  | 1.45(3) |
| C37-C38  | 1.40(3) | C51-H51  | 0.95    |
| C37-H37  | 0.95    | C52-H52  | 0.95    |
| C38-H38  | 0.95    | C53-C54  | 1.53(3) |
| C39-C40  | 1.44(4) | C53-H53A | 0.99    |
| C39-H39A | 0.99    | C53-H53B | 0.99    |
| C39-H39B | 0.99    | C54-H54A | 0.98    |
| C40-H40A | 0.98    | C54-H54B | 0.98    |
| C40-H40B | 0.98    | C54-H54C | 0.98    |
| C40-H40C | 0.98    | C55-C56  | 1.56(3) |
| C41-C42  | 1.53(3) | C55-H55A | 0.99    |
| C41-H41A | 0.99    | C55-H55B | 0.99    |
| C41-H41B | 0.99    | C56-H56A | 0.98    |
| C42-H42A | 0.98    | C56-H56B | 0.98    |
| C42-H42B | 0.98    | C56-H56C | 0.98    |

|           |          |            |          |
|-----------|----------|------------|----------|
| C57-C58   | 1.49(3)  | C64-C65    | 1.52(3)  |
| C58-C59   | 1.31(3)  | C65-C70    | 1.37(3)  |
| C58-C63   | 1.39(3)  | C65-C66    | 1.39(3)  |
| C59-C60   | 1.42(3)  | C66-C67    | 1.43(4)  |
| C59-H59   | 0.95     | C66-H66    | 0.95     |
| C60-C61   | 1.43(4)  | C67-C68    | 1.37(4)  |
| C60-H60   | 0.95     | C67-H67    | 0.95     |
| C61-C62   | 1.26(4)  | C68-C69    | 1.28(4)  |
| C61-H61   | 0.95     | C68-H68    | 0.95     |
| C62-C63   | 1.40(3)  | C69-C70    | 1.45(4)  |
| C62-H62   | 0.95     | C69-H69    | 0.95     |
| C63-H63   | 0.95     | C70-H70    | 0.95     |
| O4-Th1-O3 | 52.1(3)  | O2-Th1-N5  | 75.7(4)  |
| O4-Th1-O2 | 139.4(4) | O1-Th1-N5  | 81.7(4)  |
| O3-Th1-O2 | 150.9(4) | N2-Th1-N5  | 156.3(4) |
| O4-Th1-O1 | 146.0(4) | N4-Th1-N5  | 65.9(4)  |
| O3-Th1-O1 | 140.5(4) | N6-Th1-N5  | 60.5(4)  |
| O2-Th1-O1 | 51.5(4)  | O4-Th1-N1  | 93.4(4)  |
| O4-Th1-N2 | 129.2(4) | O3-Th1-N1  | 75.7(4)  |
| O3-Th1-N2 | 77.5(4)  | O2-Th1-N1  | 76.8(4)  |
| O2-Th1-N2 | 82.6(4)  | O1-Th1-N1  | 119.3(4) |
| O1-Th1-N2 | 77.4(4)  | N2-Th1-N1  | 65.4(4)  |
| O4-Th1-N4 | 73.6(4)  | N4-Th1-N1  | 165.5(4) |
| O3-Th1-N4 | 91.0(4)  | N6-Th1-N1  | 58.0(4)  |
| O2-Th1-N4 | 117.3(4) | N5-Th1-N1  | 117.4(4) |
| O1-Th1-N4 | 74.8(4)  | O4-Th1-N3  | 101.6(4) |
| N2-Th1-N4 | 117.9(4) | O3-Th1-N3  | 70.3(4)  |
| O4-Th1-N6 | 69.1(4)  | O2-Th1-N3  | 117.4(4) |
| O3-Th1-N6 | 100.2(4) | O1-Th1-N3  | 71.0(4)  |
| O2-Th1-N6 | 72.5(4)  | N2-Th1-N3  | 60.8(4)  |
| O1-Th1-N6 | 118.8(4) | N4-Th1-N3  | 57.9(4)  |
| N2-Th1-N6 | 121.6(4) | N6-Th1-N3  | 169.9(4) |
| N4-Th1-N6 | 120.5(4) | N5-Th1-N3  | 121.9(4) |
| O4-Th1-N5 | 74.5(4)  | N1-Th1-N3  | 120.7(4) |
| O3-Th1-N5 | 126.2(4) | C57-O1-Th1 | 93.0(10) |

|            |           |             |           |
|------------|-----------|-------------|-----------|
| C57-O2-Th1 | 96.0(11)  | C5-C6-N2    | 115.4(14) |
| C64-O3-Th1 | 93.7(10)  | C5-C6-C7    | 132.2(16) |
| C64-O4-Th1 | 94.6(9)   | N2-C6-C7    | 111.5(14) |
| C1-N1-C4   | 106.2(12) | C8-C7-C6    | 105.2(15) |
| C1-N1-Th1  | 115.4(10) | C8-C7-C39   | 128.7(17) |
| C4-N1-Th1  | 131.8(10) | C6-C7-C39   | 125.3(17) |
| C9-N2-C6   | 101.0(12) | C7-C8-C9    | 105.8(15) |
| C9-N2-Th1  | 116.0(9)  | C7-C8-C41   | 125.8(17) |
| C6-N2-Th1  | 129.7(10) | C9-C8-C41   | 127.9(16) |
| C14-N3-C10 | 120.4(14) | N2-C9-C8    | 115.1(14) |
| C14-N3-Th1 | 119.6(10) | N2-C9-C10   | 114.7(13) |
| C10-N3-Th1 | 119.9(10) | C8-C9-C10   | 130.2(15) |
| C18-N4-C15 | 104.1(14) | N3-C10-C11  | 121.7(14) |
| C18-N4-Th1 | 134.5(11) | N3-C10-C9   | 114.2(14) |
| C15-N4-Th1 | 116.4(10) | C11-C10-C9  | 123.8(14) |
| C23-N5-C20 | 103.7(13) | C12-C11-C10 | 118.7(15) |
| C23-N5-Th1 | 116.1(10) | C12-C11-H11 | 120.6     |
| C20-N5-Th1 | 129.0(10) | C10-C11-H11 | 120.6     |
| C28-N6-C24 | 118.0(13) | C11-C12-C13 | 119.9(17) |
| C28-N6-Th1 | 121.1(10) | C11-C12-H12 | 120.0     |
| C24-N6-Th1 | 120.7(9)  | C13-C12-H12 | 120.0     |
| N1-C1-C2   | 114.1(13) | C12-C13-C14 | 118.5(16) |
| N1-C1-C28  | 114.3(12) | C12-C13-H13 | 120.7     |
| C2-C1-C28  | 129.9(13) | C14-C13-H13 | 120.7     |
| C3-C2-C29  | 127.4(14) | N3-C14-C13  | 120.7(14) |
| C3-C2-C1   | 102.4(13) | N3-C14-C15  | 113.9(15) |
| C29-C2-C1  | 129.9(15) | C13-C14-C15 | 124.0(15) |
| C2-C3-C4   | 107.7(13) | N4-C15-C16  | 112.8(14) |
| C2-C3-C31  | 122.0(14) | N4-C15-C14  | 113.7(15) |
| C4-C3-C31  | 129.5(15) | C16-C15-C14 | 132.1(16) |
| N1-C4-C5   | 121.2(13) | C15-C16-C17 | 104.6(15) |
| N1-C4-C3   | 109.3(12) | C15-C16-C43 | 127.0(16) |
| C5-C4-C3   | 128.5(14) | C17-C16-C43 | 128.4(16) |
| C6-C5-C4   | 124.9(14) | C18-C17-C16 | 105.8(14) |
| C6-C5-C33  | 116.8(14) | C18-C17-C45 | 128.8(16) |
| C4-C5-C33  | 118.3(14) | C16-C17-C45 | 125.0(16) |

|              |           |               |           |
|--------------|-----------|---------------|-----------|
| N4-C18-C17   | 111.9(15) | C2-C29-H29B   | 109.3     |
| N4-C18-C19   | 120.2(15) | C30-C29-H29B  | 109.3     |
| C17-C18-C19  | 127.8(15) | H29A-C29-H29B | 107.9     |
| C20-C19-C18  | 128.1(15) | C29-C30-H30A  | 109.5     |
| C20-C19-C47  | 117.1(16) | C29-C30-H30B  | 109.5     |
| C18-C19-C47  | 114.6(16) | H30A-C30-H30B | 109.5     |
| C19-C20-C21  | 135.1(15) | C29-C30-H30C  | 109.5     |
| C19-C20-N5   | 114.7(15) | H30A-C30-H30C | 109.5     |
| C21-C20-N5   | 109.4(14) | H30B-C30-H30C | 109.5     |
| C20-C21-C22  | 106.9(14) | C3-C31-C32    | 108.8(15) |
| C20-C21-C53  | 128.8(16) | C3-C31-H31A   | 109.9     |
| C22-C21-C53  | 124.2(16) | C32-C31-H31A  | 109.9     |
| C21-C22-C23  | 106.1(15) | C3-C31-H31B   | 109.9     |
| C21-C22-C55  | 127.4(15) | C32-C31-H31B  | 109.9     |
| C23-C22-C55  | 126.4(15) | H31A-C31-H31B | 108.3     |
| N5-C23-C22   | 112.4(14) | C31-C32-H32A  | 109.5     |
| N5-C23-C24   | 115.4(14) | C31-C32-H32B  | 109.5     |
| C22-C23-C24  | 132.2(15) | H32A-C32-H32B | 109.5     |
| N6-C24-C25   | 122.8(14) | C31-C32-H32C  | 109.5     |
| N6-C24-C23   | 114.7(13) | H32A-C32-H32C | 109.5     |
| C25-C24-C23  | 122.2(13) | H32B-C32-H32C | 109.5     |
| C26-C25-C24  | 116.4(14) | C34-C33-C38   | 120.0(17) |
| C26-C25-H25  | 121.8     | C34-C33-C5    | 120.3(16) |
| C24-C25-H25  | 121.8     | C38-C33-C5    | 119.8(17) |
| C27-C26-C25  | 122.3(15) | C33-C34-C35   | 119.3(18) |
| C27-C26-H26  | 118.9     | C33-C34-H34   | 120.3     |
| C25-C26-H26  | 118.9     | C35-C34-H34   | 120.3     |
| C26-C27-C28  | 117.6(15) | C34-C35-C36   | 121(2)    |
| C26-C27-H27  | 121.2     | C34-C35-H35   | 119.6     |
| C28-C27-H27  | 121.2     | C36-C35-H35   | 119.6     |
| N6-C28-C27   | 122.6(14) | C37-C36-C35   | 120(2)    |
| N6-C28-C1    | 111.9(13) | C37-C36-H36   | 120.1     |
| C27-C28-C1   | 124.5(13) | C35-C36-H36   | 120.1     |
| C2-C29-C30   | 111.8(16) | C36-C37-C38   | 119(2)    |
| C2-C29-H29A  | 109.3     | C36-C37-H37   | 120.3     |
| C30-C29-H29A | 109.3     | C38-C37-H37   | 120.3     |

|               |           |               |           |
|---------------|-----------|---------------|-----------|
| C37-C38-C33   | 121(2)    | C43-C44-H44C  | 109.5     |
| C37-C38-H38   | 119.7     | H44A-C44-H44C | 109.5     |
| C33-C38-H38   | 119.7     | H44B-C44-H44C | 109.5     |
| C40-C39-C7    | 110.3(19) | C46-C45-C17   | 112.9(16) |
| C40-C39-H39A  | 109.6     | C46-C45-H45A  | 109.0     |
| C7-C39-H39A   | 109.6     | C17-C45-H45A  | 109.0     |
| C40-C39-H39B  | 109.6     | C46-C45-H45B  | 109.0     |
| C7-C39-H39B   | 109.6     | C17-C45-H45B  | 109.0     |
| H39A-C39-H39B | 108.1     | H45A-C45-H45B | 107.8     |
| C39-C40-H40A  | 109.5     | C45-C46-H46A  | 109.5     |
| C39-C40-H40B  | 109.5     | C45-C46-H46B  | 109.5     |
| H40A-C40-H40B | 109.5     | H46A-C46-H46B | 109.5     |
| C39-C40-H40C  | 109.5     | C45-C46-H46C  | 109.5     |
| H40A-C40-H40C | 109.5     | H46A-C46-H46C | 109.5     |
| H40B-C40-H40C | 109.5     | H46B-C46-H46C | 109.5     |
| C8-C41-C42    | 112.7(16) | C52-C47-C48   | 119.4(19) |
| C8-C41-H41A   | 109.1     | C52-C47-C19   | 123(2)    |
| C42-C41-H41A  | 109.1     | C48-C47-C19   | 117.9(18) |
| C8-C41-H41B   | 109.1     | C49-C48-C47   | 121(2)    |
| C42-C41-H41B  | 109.1     | C49-C48-H48   | 119.5     |
| H41A-C41-H41B | 107.8     | C47-C48-H48   | 119.5     |
| C41-C42-H42A  | 109.5     | C50-C49-C48   | 118(3)    |
| C41-C42-H42B  | 109.5     | C50-C49-H49   | 121.2     |
| H42A-C42-H42B | 109.5     | C48-C49-H49   | 121.2     |
| C41-C42-H42C  | 109.5     | C51-C50-C49   | 123(2)    |
| H42A-C42-H42C | 109.5     | C51-C50-H50   | 118.7     |
| H42B-C42-H42C | 109.5     | C49-C50-H50   | 118.7     |
| C16-C43-C44   | 113.8(17) | C50-C51-C52   | 120(2)    |
| C16-C43-H43A  | 108.8     | C50-C51-H51   | 119.8     |
| C44-C43-H43A  | 108.8     | C52-C51-H51   | 119.8     |
| C16-C43-H43B  | 108.8     | C47-C52-C51   | 119(2)    |
| C44-C43-H43B  | 108.8     | C47-C52-H52   | 120.5     |
| H43A-C43-H43B | 107.7     | C51-C52-H52   | 120.5     |
| C43-C44-H44A  | 109.5     | C21-C53-C54   | 109.8(14) |
| C43-C44-H44B  | 109.5     | C21-C53-H53A  | 109.7     |
| H44A-C44-H44B | 109.5     | C54-C53-H53A  | 109.7     |

|               |           |             |           |
|---------------|-----------|-------------|-----------|
| C21-C53-H53B  | 109.7     | C61-C60-H60 | 120.9     |
| C54-C53-H53B  | 109.7     | C62-C61-C60 | 118(3)    |
| H53A-C53-H53B | 108.2     | C62-C61-H61 | 120.9     |
| C53-C54-H54A  | 109.5     | C60-C61-H61 | 120.9     |
| C53-C54-H54B  | 109.5     | C61-C62-C63 | 126(3)    |
| H54A-C54-H54B | 109.5     | C61-C62-H62 | 117.1     |
| C53-C54-H54C  | 109.5     | C63-C62-H62 | 117.1     |
| H54A-C54-H54C | 109.5     | C58-C63-C62 | 116(2)    |
| H54B-C54-H54C | 109.5     | C58-C63-H63 | 122.1     |
| C22-C55-C56   | 108.7(15) | C62-C63-H63 | 122.1     |
| C22-C55-H55A  | 109.9     | O4-C64-O3   | 119.5(16) |
| C56-C55-H55A  | 109.9     | O4-C64-C65  | 120.4(15) |
| C22-C55-H55B  | 109.9     | O3-C64-C65  | 120.1(17) |
| C56-C55-H55B  | 109.9     | C70-C65-C66 | 121(2)    |
| H55A-C55-H55B | 108.3     | C70-C65-C64 | 121.0(19) |
| C55-C56-H56A  | 109.5     | C66-C65-C64 | 118.1(19) |
| C55-C56-H56B  | 109.5     | C65-C66-C67 | 123(3)    |
| H56A-C56-H56B | 109.5     | C65-C66-H66 | 118.4     |
| C55-C56-H56C  | 109.5     | C67-C66-H66 | 118.4     |
| H56A-C56-H56C | 109.5     | C68-C67-C66 | 109(3)    |
| H56B-C56-H56C | 109.5     | C68-C67-H67 | 125.5     |
| O2-C57-O1     | 118.8(17) | C66-C67-H67 | 125.5     |
| O2-C57-C58    | 121.9(18) | C69-C68-C67 | 132(3)    |
| O1-C57-C58    | 119.2(16) | C69-C68-H68 | 114.0     |
| C59-C58-C63   | 122(2)    | C67-C68-H68 | 114.0     |
| C59-C58-C57   | 119(2)    | C68-C69-C70 | 116(3)    |
| C63-C58-C57   | 118.9(19) | C68-C69-H69 | 121.8     |
| C58-C59-C60   | 120(3)    | C70-C69-H69 | 121.8     |
| C58-C59-H59   | 120.1     | C65-C70-C69 | 117(2)    |
| C60-C59-H59   | 120.1     | C65-C70-H70 | 121.6     |
| C59-C60-C61   | 118(3)    | C69-C70-H70 | 121.6     |
| C59-C60-H60   | 120.9     |             |           |



Anisotropic displacement parameters ( $\text{\AA}^2 \times 10^3$ ) for complex **4**. The anisotropic displacement factor exponent takes the form:  $-2\pi^2[ h^2 a^{*2}U^{11} + \dots + 2 h k a^* b^* U^{12} ]$

|     | U <sup>11</sup> | U <sup>22</sup> | U <sup>33</sup> | U <sup>23</sup> | U <sup>13</sup> | U <sup>12</sup> |
|-----|-----------------|-----------------|-----------------|-----------------|-----------------|-----------------|
| Th1 | 60(1)           | 34(1)           | 24(1)           | 1(1)            | -5(1)           | 23(1)           |
| O1  | 63(5)           | 50(5)           | 53(6)           | 13(4)           | 8(4)            | 32(5)           |
| O2  | 42(5)           | 48(5)           | 44(5)           | 12(4)           | -4(4)           | 22(4)           |
| O3  | 62(5)           | 35(4)           | 29(4)           | -10(4)          | -3(4)           | 29(4)           |
| O4  | 62(5)           | 45(5)           | 21(4)           | 10(3)           | -10(4)          | 26(4)           |
| N1  | 62(6)           | 34(4)           | 28(4)           | 10(3)           | -6(4)           | 23(4)           |
| N2  | 51(5)           | 36(5)           | 24(4)           | 6(4)            | 1(4)            | 17(4)           |
| N3  | 50(4)           | 28(5)           | 26(4)           | 4(4)            | 0(3)            | 17(4)           |
| N4  | 58(5)           | 40(5)           | 29(5)           | 0(4)            | 0(4)            | 17(4)           |
| N5  | 62(6)           | 35(4)           | 30(5)           | 0(4)            | 5(4)            | 17(4)           |
| N6  | 48(6)           | 29(4)           | 20(4)           | 5(3)            | 0(4)            | 12(4)           |
| C1  | 47(6)           | 23(4)           | 31(5)           | 6(4)            | -2(5)           | 12(4)           |
| C2  | 43(6)           | 31(5)           | 36(5)           | 1(4)            | -2(5)           | 15(5)           |
| C3  | 48(7)           | 30(5)           | 38(5)           | 4(4)            | -6(5)           | 13(5)           |
| C4  | 47(6)           | 31(5)           | 25(5)           | 3(4)            | 2(4)            | 17(4)           |
| C5  | 46(5)           | 43(5)           | 31(6)           | 4(4)            | -1(4)           | 23(4)           |
| C6  | 54(5)           | 44(5)           | 33(6)           | 4(4)            | -4(5)           | 21(4)           |
| C7  | 60(5)           | 49(7)           | 42(7)           | 12(5)           | -5(5)           | 22(5)           |
| C8  | 58(5)           | 41(6)           | 41(7)           | 9(5)            | -9(5)           | 20(5)           |
| C9  | 54(5)           | 32(5)           | 21(5)           | -2(4)           | -4(4)           | 21(4)           |
| C10 | 51(5)           | 38(6)           | 32(5)           | 3(5)            | -1(4)           | 17(5)           |
| C11 | 53(5)           | 42(6)           | 31(5)           | 2(5)            | -4(5)           | 23(5)           |
| C12 | 57(6)           | 45(7)           | 40(6)           | 4(5)            | 4(5)            | 25(5)           |
| C13 | 52(6)           | 46(7)           | 41(5)           | 5(5)            | 6(4)            | 15(5)           |
| C14 | 50(5)           | 36(6)           | 39(5)           | 3(4)            | 1(4)            | 22(4)           |
| C15 | 55(5)           | 36(6)           | 37(5)           | 1(4)            | 2(4)            | 21(4)           |
| C16 | 53(5)           | 36(6)           | 32(5)           | 11(4)           | 3(4)            | 11(4)           |
| C17 | 54(5)           | 36(6)           | 43(6)           | 3(5)            | -2(4)           | 15(5)           |
| C18 | 54(5)           | 42(6)           | 39(6)           | -6(5)           | -1(4)           | 18(5)           |
| C19 | 53(6)           | 39(5)           | 37(6)           | -7(4)           | 2(5)            | 17(4)           |
| C20 | 51(6)           | 38(5)           | 35(6)           | 0(4)            | -1(4)           | 19(4)           |

|     |        |         |        |        |        |        |
|-----|--------|---------|--------|--------|--------|--------|
| C21 | 50(7)  | 34(5)   | 47(7)  | -1(5)  | 3(5)   | 16(5)  |
| C22 | 52(6)  | 32(5)   | 33(5)  | -6(4)  | -4(4)  | 16(5)  |
| C23 | 58(7)  | 36(4)   | 20(5)  | -1(4)  | 1(4)   | 19(5)  |
| C24 | 41(6)  | 34(4)   | 26(4)  | 0(4)   | -5(5)  | 15(5)  |
| C25 | 45(7)  | 38(5)   | 25(5)  | 1(4)   | -4(5)  | 13(5)  |
| C26 | 47(7)  | 41(5)   | 27(5)  | 3(4)   | -14(5) | 13(5)  |
| C27 | 50(7)  | 40(6)   | 36(5)  | 2(4)   | -7(5)  | 19(5)  |
| C28 | 40(6)  | 32(4)   | 36(5)  | -1(4)  | -8(5)  | 14(5)  |
| C29 | 70(7)  | 43(6)   | 50(7)  | 7(5)   | -8(6)  | 30(6)  |
| C30 | 91(11) | 72(11)  | 49(10) | 18(8)  | 2(8)   | 28(9)  |
| C31 | 62(7)  | 40(6)   | 44(7)  | 1(5)   | -3(5)  | 22(6)  |
| C32 | 72(10) | 52(9)   | 47(9)  | -16(7) | -4(7)  | 21(8)  |
| C33 | 48(5)  | 47(6)   | 36(5)  | 5(5)   | -7(4)  | 18(4)  |
| C34 | 55(6)  | 52(7)   | 42(6)  | 11(5)  | -1(5)  | 23(5)  |
| C35 | 59(7)  | 60(7)   | 53(6)  | 9(6)   | -3(6)  | 20(5)  |
| C36 | 68(7)  | 60(8)   | 56(6)  | 2(6)   | -3(6)  | 18(6)  |
| C37 | 63(7)  | 66(8)   | 44(7)  | 5(6)   | -12(5) | 18(5)  |
| C38 | 60(7)  | 54(7)   | 43(6)  | -4(5)  | -10(5) | 21(5)  |
| C39 | 61(6)  | 72(9)   | 65(8)  | 19(7)  | -7(6)  | 30(6)  |
| C40 | 82(12) | 151(18) | 80(12) | 14(12) | 10(10) | 65(13) |
| C41 | 56(7)  | 54(7)   | 53(7)  | 16(5)  | -10(6) | 23(6)  |
| C42 | 85(12) | 58(8)   | 61(11) | 25(7)  | -10(9) | 38(8)  |
| C43 | 57(7)  | 56(7)   | 50(8)  | 0(6)   | 6(6)   | 16(6)  |
| C44 | 72(10) | 63(9)   | 42(9)  | -10(8) | -10(8) | 27(8)  |
| C45 | 53(6)  | 51(7)   | 43(6)  | -4(5)  | 1(5)   | 24(5)  |
| C46 | 74(11) | 58(10)  | 50(8)  | -1(7)  | -5(8)  | 26(9)  |
| C47 | 55(7)  | 41(5)   | 57(6)  | -1(4)  | 4(6)   | 18(5)  |
| C48 | 70(8)  | 55(6)   | 72(8)  | 11(5)  | 4(7)   | 26(6)  |
| C49 | 87(9)  | 64(6)   | 80(7)  | 11(6)  | 7(7)   | 33(6)  |
| C50 | 91(10) | 70(8)   | 83(7)  | 0(6)   | 6(7)   | 42(7)  |
| C51 | 72(9)  | 69(7)   | 65(7)  | -9(6)  | 0(7)   | 28(6)  |
| C52 | 68(8)  | 62(6)   | 60(7)  | -13(6) | 0(6)   | 24(6)  |
| C53 | 63(8)  | 41(6)   | 47(7)  | 4(5)   | -1(6)  | 28(6)  |
| C54 | 84(11) | 56(9)   | 63(10) | -12(8) | -19(9) | 44(9)  |
| C55 | 55(7)  | 46(7)   | 45(6)  | 4(5)   | 6(5)   | 25(6)  |
| C56 | 87(11) | 49(9)   | 49(8)  | -5(7)  | 4(8)   | 20(9)  |

|     |         |         |         |       |       |       |
|-----|---------|---------|---------|-------|-------|-------|
| C57 | 58(7)   | 53(6)   | 45(7)   | 16(5) | 3(5)  | 26(5) |
| C58 | 59(7)   | 46(6)   | 45(7)   | -6(5) | -3(5) | 24(5) |
| C59 | 83(9)   | 76(9)   | 82(9)   | 15(7) | 26(7) | 43(7) |
| C60 | 87(9)   | 82(9)   | 92(10)  | 6(7)  | 21(7) | 49(7) |
| C61 | 97(10)  | 82(9)   | 99(10)  | 4(7)  | 6(7)  | 51(8) |
| C62 | 91(9)   | 75(9)   | 82(9)   | 6(7)  | -7(6) | 51(7) |
| C63 | 81(9)   | 64(8)   | 67(8)   | 12(6) | -1(6) | 42(7) |
| C64 | 54(6)   | 54(7)   | 30(5)   | 14(4) | 0(4)  | 23(5) |
| C65 | 59(6)   | 54(6)   | 46(7)   | 23(5) | 6(5)  | 27(5) |
| C66 | 61(7)   | 66(8)   | 67(8)   | 24(6) | -5(6) | 20(6) |
| C67 | 90(9)   | 105(10) | 98(10)  | 16(7) | -6(7) | 52(8) |
| C68 | 104(10) | 104(10) | 100(10) | 18(7) | 2(7)  | 53(8) |
| C69 | 96(9)   | 91(10)  | 86(9)   | 13(7) | 14(7) | 54(7) |
| C70 | 94(8)   | 73(8)   | 67(9)   | 13(6) | 12(7) | 46(7) |

---

Hydrogen coordinates ( $\times 10^4$ ) and isotropic displacement parameters ( $\text{\AA}^2 \times 10^3$ ) for complex **4**.

|      | x     | y    | z    | U(eq) |
|------|-------|------|------|-------|
| H11  | 4266  | 5841 | -584 | 50    |
| H12  | 6077  | 6795 | -720 | 56    |
| H13  | 7228  | 7294 | 344  | 59    |
| H25  | 3745  | 5198 | 5587 | 46    |
| H26  | 3477  | 3525 | 5688 | 49    |
| H27  | 3232  | 2468 | 4637 | 51    |
| H29A | 3479  | 1491 | 3806 | 64    |
| H29B | 3064  | 681  | 3101 | 64    |
| H30A | 1258  | 174  | 3484 | 111   |
| H30B | 1745  | 889  | 4231 | 111   |
| H30C | 1925  | -96  | 4079 | 111   |
| H31A | 1087  | 546  | 1610 | 60    |
| H31B | 1609  | 125  | 2215 | 60    |
| H32A | 2677  | 1237 | 930  | 91    |
| H32B | 2323  | 48   | 1027 | 91    |
| H32C | 3253  | 902  | 1553 | 91    |
| H34  | -16   | 1676 | 2275 | 60    |
| H35  | -1622 | 339  | 1822 | 72    |
| H36  | -1904 | -167 | 539  | 79    |
| H37  | -560  | 646  | -286 | 75    |
| H38  | 1069  | 1971 | 172  | 66    |
| H39A | 186   | 4037 | 148  | 79    |
| H39B | -33   | 3043 | 596  | 79    |
| H40A | -707  | 3945 | 1239 | 150   |
| H40B | 388   | 4971 | 1235 | 150   |
| H40C | 293   | 4040 | 1713 | 150   |
| H41A | 1442  | 5226 | -451 | 66    |
| H41B | 2627  | 5591 | -690 | 66    |
| H42A | 2396  | 7038 | -367 | 98    |
| H42B | 3219  | 6986 | 222  | 98    |
| H42C | 2028  | 6627 | 445  | 98    |

|      |      |       |      |     |
|------|------|-------|------|-----|
| H43A | 9275 | 8479  | 1807 | 70  |
| H43B | 8582 | 8231  | 1046 | 70  |
| H44A | 9322 | 7092  | 1111 | 92  |
| H44B | 8069 | 6447  | 1132 | 92  |
| H44C | 8777 | 6703  | 1887 | 92  |
| H45A | 9272 | 9336  | 2805 | 59  |
| H45B | 8568 | 9715  | 3278 | 59  |
| H46A | 8891 | 8019  | 3667 | 94  |
| H46B | 8291 | 8502  | 4160 | 94  |
| H46C | 9531 | 9145  | 4059 | 94  |
| H48  | 6626 | 9814  | 2580 | 79  |
| H49  | 7541 | 11605 | 2831 | 93  |
| H50  | 8200 | 12224 | 4040 | 96  |
| H51  | 7984 | 11169 | 4968 | 85  |
| H52  | 7058 | 9343  | 4731 | 80  |
| H53A | 5354 | 9493  | 4575 | 59  |
| H53B | 4247 | 8878  | 4960 | 59  |
| H54A | 4448 | 9154  | 3383 | 96  |
| H54B | 4068 | 9784  | 3941 | 96  |
| H54C | 3350 | 8577  | 3782 | 96  |
| H55A | 2913 | 6135  | 5393 | 57  |
| H55B | 2893 | 7188  | 5222 | 57  |
| H56A | 4456 | 8134  | 5997 | 98  |
| H56B | 4520 | 7101  | 6148 | 98  |
| H56C | 3585 | 7280  | 6480 | 98  |
| H59  | 1469 | 6038  | 3522 | 92  |
| H60  | 340  | 6818  | 3644 | 100 |
| H61  | 568  | 8153  | 2825 | 106 |
| H62  | 1751 | 8558  | 1975 | 93  |
| H63  | 2733 | 7681  | 1742 | 81  |
| H66  | 7583 | 5405  | 3332 | 81  |
| H67  | 9032 | 4975  | 3369 | 114 |
| H68  | 8617 | 3452  | 2697 | 120 |
| H69  | 7517 | 2829  | 1728 | 104 |
| H70  | 5981 | 3142  | 1757 | 90  |

## Torsion angles [°] for complex 4.

---

|               |            |                 |            |
|---------------|------------|-----------------|------------|
| C4-N1-C1-C2   | 6(2)       | C5-C6-C7-C39    | 32(3)      |
| Th1-N1-C1-C2  | -148.9(11) | N2-C6-C7-C39    | -159.3(18) |
| C4-N1-C1-C28  | -160.4(14) | C6-C7-C8-C9     | -5(2)      |
| Th1-N1-C1-C28 | 44.5(17)   | C39-C7-C8-C9    | 164.6(19)  |
| N1-C1-C2-C3   | -6(2)      | C6-C7-C8-C41    | -177.6(18) |
| C28-C1-C2-C3  | 158.3(17)  | C39-C7-C8-C41   | -8(3)      |
| N1-C1-C2-C29  | 179.5(18)  | C6-N2-C9-C8     | 8.4(17)    |
| C28-C1-C2-C29 | -16(3)     | Th1-N2-C9-C8    | -136.5(12) |
| C29-C2-C3-C4  | 177.7(17)  | C6-N2-C9-C10    | -170.2(13) |
| C1-C2-C3-C4   | 2.7(18)    | Th1-N2-C9-C10   | 44.9(16)   |
| C29-C2-C3-C31 | -12(3)     | C7-C8-C9-N2     | -2(2)      |
| C1-C2-C3-C31  | 173.2(16)  | C41-C8-C9-N2    | 170.0(18)  |
| C1-N1-C4-C5   | 165.4(15)  | C7-C8-C9-C10    | 176.2(16)  |
| Th1-N1-C4-C5  | -45(2)     | C41-C8-C9-C10   | -12(3)     |
| C1-N1-C4-C3   | -4.0(19)   | C14-N3-C10-C11  | 2(2)       |
| Th1-N1-C4-C3  | 145.2(12)  | Th1-N3-C10-C11  | -173.6(12) |
| C2-C3-C4-N1   | 1(2)       | C14-N3-C10-C9   | 175.3(13)  |
| C31-C3-C4-N1  | -168.9(17) | Th1-N3-C10-C9   | 0.0(17)    |
| C2-C3-C4-C5   | -167.9(16) | N2-C9-C10-N3    | -29.0(19)  |
| C31-C3-C4-C5  | 23(3)      | C8-C9-C10-N3    | 152.7(16)  |
| N1-C4-C5-C6   | 35(3)      | N2-C9-C10-C11   | 144.5(16)  |
| C3-C4-C5-C6   | -158.2(18) | C8-C9-C10-C11   | -34(3)     |
| N1-C4-C5-C33  | -148.4(15) | N3-C10-C11-C12  | 1(2)       |
| C3-C4-C5-C33  | 19(3)      | C9-C10-C11-C12  | -172.3(15) |
| C4-C5-C6-N2   | 17(2)      | C10-C11-C12-C13 | -1(2)      |
| C33-C5-C6-N2  | -160.1(14) | C11-C12-C13-C14 | -2(3)      |
| C4-C5-C6-C7   | -174.8(18) | C10-N3-C14-C13  | -4(2)      |
| C33-C5-C6-C7  | 8(3)       | Th1-N3-C14-C13  | 171.4(12)  |
| C9-N2-C6-C5   | 159.0(15)  | C10-N3-C14-C15  | 162.8(14)  |
| Th1-N2-C6-C5  | -63.2(19)  | Th1-N3-C14-C15  | -21.9(17)  |
| C9-N2-C6-C7   | -11.7(18)  | C12-C13-C14-N3  | 4(2)       |
| Th1-N2-C6-C7  | 126.1(13)  | C12-C13-C14-C15 | -161.4(16) |
| C5-C6-C7-C8   | -158(2)    | C18-N4-C15-C16  | 9.6(19)    |
| N2-C6-C7-C8   | 11(2)      | Th1-N4-C15-C16  | -149.1(11) |

|                 |            |                 |            |
|-----------------|------------|-----------------|------------|
| C18-N4-C15-C14  | -158.4(14) | C19-C20-C21-C53 | 26(3)      |
| Th1-N4-C15-C14  | 42.9(17)   | N5-C20-C21-C53  | -165.8(16) |
| N3-C14-C15-N4   | -13(2)     | C20-C21-C22-C23 | -4.9(19)   |
| C13-C14-C15-N4  | 153.1(16)  | C53-C21-C22-C23 | 171.8(15)  |
| N3-C14-C15-C16  | -178.2(16) | C20-C21-C22-C55 | 177.2(16)  |
| C13-C14-C15-C16 | -12(3)     | C53-C21-C22-C55 | -6(3)      |
| N4-C15-C16-C17  | -6.9(19)   | C20-N5-C23-C22  | 9.4(18)    |
| C14-C15-C16-C17 | 158.2(18)  | Th1-N5-C23-C22  | -137.9(11) |
| N4-C15-C16-C43  | 171.4(17)  | C20-N5-C23-C24  | -170.8(13) |
| C14-C15-C16-C43 | -23(3)     | Th1-N5-C23-C24  | 41.9(17)   |
| C15-C16-C17-C18 | 1.3(18)    | C21-C22-C23-N5  | -3(2)      |
| C43-C16-C17-C18 | -177.0(18) | C55-C22-C23-N5  | 174.7(15)  |
| C15-C16-C17-C45 | 174.6(16)  | C21-C22-C23-C24 | 177.0(17)  |
| C43-C16-C17-C45 | -4(3)      | C55-C22-C23-C24 | -5(3)      |
| C15-N4-C18-C17  | -8.6(19)   | C28-N6-C24-C25  | 2(2)       |
| Th1-N4-C18-C17  | 144.3(14)  | Th1-N6-C24-C25  | -173.6(11) |
| C15-N4-C18-C19  | 167.4(17)  | C28-N6-C24-C23  | 176.1(14)  |
| Th1-N4-C18-C19  | -40(3)     | Th1-N6-C24-C23  | 0.8(18)    |
| C16-C17-C18-N4  | 5(2)       | N5-C23-C24-N6   | -28(2)     |
| C45-C17-C18-N4  | -168.4(17) | C22-C23-C24-N6  | 151.5(17)  |
| C16-C17-C18-C19 | -171.0(18) | N5-C23-C24-C25  | 146.2(15)  |
| C45-C17-C18-C19 | 16(3)      | C22-C23-C24-C25 | -34(3)     |
| N4-C18-C19-C20  | 30(3)      | N6-C24-C25-C26  | 4(2)       |
| C17-C18-C19-C20 | -155.0(19) | C23-C24-C25-C26 | -170.3(15) |
| N4-C18-C19-C47  | -146.1(17) | C24-C25-C26-C27 | -6(2)      |
| C17-C18-C19-C47 | 29(3)      | C25-C26-C27-C28 | 2(3)       |
| C18-C19-C20-C21 | -174.2(19) | C24-N6-C28-C27  | -5(2)      |
| C47-C19-C20-C21 | 1(3)       | Th1-N6-C28-C27  | 170.0(12)  |
| C18-C19-C20-N5  | 18(3)      | C24-N6-C28-C1   | 164.2(13)  |
| C47-C19-C20-N5  | -166.4(15) | Th1-N6-C28-C1   | -20.5(17)  |
| C23-N5-C20-C19  | 158.6(16)  | C26-C27-C28-N6  | 3(2)       |
| Th1-N5-C20-C19  | -60(2)     | C26-C27-C28-C1  | -164.8(15) |
| C23-N5-C20-C21  | -12.4(18)  | N1-C1-C28-N6    | -16(2)     |
| Th1-N5-C20-C21  | 129.0(13)  | C2-C1-C28-N6    | 179.9(16)  |
| C19-C20-C21-C22 | -158(2)    | N1-C1-C28-C27   | 153.2(16)  |
| N5-C20-C21-C22  | 10.7(19)   | C2-C1-C28-C27   | -11(3)     |

|                 |            |                 |            |
|-----------------|------------|-----------------|------------|
| C3-C2-C29-C30   | -73(2)     | C20-C21-C53-C54 | 68(2)      |
| C1-C2-C29-C30   | 101(2)     | C22-C21-C53-C54 | -108(2)    |
| C2-C3-C31-C32   | -92(2)     | C21-C22-C55-C56 | -72(2)     |
| C4-C3-C31-C32   | 76(2)      | C23-C22-C55-C56 | 110.3(19)  |
| C6-C5-C33-C34   | -125.1(18) | Th1-O2-C57-O1   | 8.5(19)    |
| C4-C5-C33-C34   | 58(2)      | Th1-O2-C57-C58  | -175.7(16) |
| C6-C5-C33-C38   | 57(2)      | Th1-O1-C57-O2   | -8.3(19)   |
| C4-C5-C33-C38   | -120.3(18) | Th1-O1-C57-C58  | 175.8(15)  |
| C38-C33-C34-C35 | -3(3)      | O2-C57-C58-C59  | 19(3)      |
| C5-C33-C34-C35  | 179.3(16)  | O1-C57-C58-C59  | -165(2)    |
| C33-C34-C35-C36 | 1(3)       | O2-C57-C58-C63  | -167.6(19) |
| C34-C35-C36-C37 | 1(3)       | O1-C57-C58-C63  | 8(3)       |
| C35-C36-C37-C38 | 0(3)       | C63-C58-C59-C60 | 5(4)       |
| C36-C37-C38-C33 | -2(3)      | C57-C58-C59-C60 | 178(2)     |
| C34-C33-C38-C37 | 4(3)       | C58-C59-C60-C61 | -5(4)      |
| C5-C33-C38-C37  | -178.6(17) | C59-C60-C61-C62 | 1(4)       |
| C8-C7-C39-C40   | -98(3)     | C60-C61-C62-C63 | 3(5)       |
| C6-C7-C39-C40   | 70(3)      | C59-C58-C63-C62 | -1(3)      |
| C7-C8-C41-C42   | 108(2)     | C57-C58-C63-C62 | -174.2(19) |
| C9-C8-C41-C42   | -63(3)     | C61-C62-C63-C58 | -3(4)      |
| C15-C16-C43-C44 | -56(2)     | Th1-O4-C64-O3   | -4.2(17)   |
| C17-C16-C43-C44 | 121.7(19)  | Th1-O4-C64-C65  | 177.8(14)  |
| C18-C17-C45-C46 | 67(2)      | Th1-O3-C64-O4   | 4.2(17)    |
| C16-C17-C45-C46 | -105(2)    | Th1-O3-C64-C65  | -177.7(14) |
| C20-C19-C47-C52 | 62(3)      | O4-C64-C65-C70  | 158.3(19)  |
| C18-C19-C47-C52 | -122(2)    | O3-C64-C65-C70  | -20(3)     |
| C20-C19-C47-C48 | -121(2)    | O4-C64-C65-C66  | -20(3)     |
| C18-C19-C47-C48 | 56(2)      | O3-C64-C65-C66  | 162.2(17)  |
| C52-C47-C48-C49 | -2(3)      | C70-C65-C66-C67 | 2(3)       |
| C19-C47-C48-C49 | -179(2)    | C64-C65-C66-C67 | -180(2)    |
| C47-C48-C49-C50 | 1(4)       | C65-C66-C67-C68 | -5(4)      |
| C48-C49-C50-C51 | 0(4)       | C66-C67-C68-C69 | 14(5)      |
| C49-C50-C51-C52 | 0(4)       | C67-C68-C69-C70 | -17(6)     |
| C48-C47-C52-C51 | 2(3)       | C66-C65-C70-C69 | -5(3)      |
| C19-C47-C52-C51 | 178.8(19)  | C64-C65-C70-C69 | 177(2)     |
| C50-C51-C52-C47 | -1(4)      | C68-C69-C70-C65 | 11(4)      |



## References:

- 1 J. T. Brewster II, D. N. Mangel, A. J. Gaunt, D. P. Saunders, H Zafar, V. M. Lynch, M. A. Boreen, M. E. Garner, C. A. P. Goodwin, N. S. Settineri, J. Arnold, and J. L. Sessler, *J. Am. Chem. Soc.*, 2019, **14**, 17867-17874.
- 2 CrysAlisPro. Rigaku Oxford Diffraction (2019). CrysAlisPro Software System, 1.171.41.70a.
- 3 SHELXT. G. M. Sheldrick. A program for crystal structure solution. *Acta Cryst.* 2015, **A71**, 3-8.
- 4 Sheldrick, G. M. SHELXL-2016/6. Program for the Refinement of Crystal Structures. *Acta Cryst.* 2015 **C71**, 3-8.
- 5 Spek, A. L. PLATON, A Multipurpose Crystallographic Tool. Utrecht University, The Netherlands. *Acta Cryst.* 2009 **D65**, 148-155.
- 6 OLEX2. Dolomanov, O. V., Bourhis, L. J., Gildea, R. J., Howard, J. A. K. and Puschmann, H. A Complete Structure Solution, Refinement and Analysis Program. *J. Appl. Cryst.* 2009, **42**, 339-341.
- 7  $R_w(F^2) = \{\sum w(|F_o|^2 - |F_c|^2)^2 / \sum w(|F_o|^4)\}^{1/2}$  where w is the weight given each reflection.  $R(F) = \{\sum |F_o| - |F_c| / \sum |F_o|\}$  for reflections with  $F_o > 4(\sum (F_o))$ .  $S = [\sum w(|F_o|^2 - |F_c|^2)^2 / (n - p)]^{1/2}$ , where n is the number of reflections and p is the number of refined parameters.
- 8 International Tables for X-ray Crystallography (1992). Vol. C, Tables 4.2.6.8 and 6.1.1.4, A. J. C. Wilson, editor, Boston: Kluwer Academic Press.
- 9 Sheldrick, G. M. (1994). SHELXTL/PC (Version 5.03). Siemens Analytical X-ray Instruments, Inc., Madison, Wisconsin, USA.
